# Supplementary material for: Arabidopsis assemble distinct root-associated microbiomes through the synthesis of an array of defense metabolites
Source: PubMed Central journal article supplement (PMC8547673; doi:10.1371/journal.pone.0259171), 2021-10-26
Supplement: pone.0259171.s001.pdf [file pone.0259171.s001.pdf]

## Supplementary file

### Additional file 1

#### **Arabidopsis sculpt distinct root-associated microbiomes through synthesis of secondary metabolites and defense signaling molecules**

Enoch Narh Kudjordjie<sup>1</sup>, Rumakanta Sapkota<sup>1,#b</sup>, Mogens Nicolaisen<sup>1\*</sup>

### Supplementary Method

#### **Library preparation**

Frozen samples were lyophilized for 72 h and ground using sterile steel beads in a Geno/Grinder2000 at 1500 rpm for 3 × 30 s. For DNA extraction 250 mg was weighed and extracted with the PowerLyzer™ PowerSoil® DNA Isolation Kit (Mo Bio Laboratories, Carlsbad, CA, USA), following the manufacturer's instructions. The DNA samples were stored at -20 °C prior to downstream processing.

The 16S and ITS amplicon libraries were generated respectively using the bacterial primers S-D-Bact-0341-b-S-17, 5'-CCTACGGGNGGCWGCAG-3' and S-D-Bact-0785-a-A-21, 5'-GACTACHVGGGTATCTAATCC-3' (1) and the fungal primers fITS7, 5'-GTGARTCATCGAATCTTTG-3' and ITS4, 5'-TCCTCCGCTTATTGATATGC-3' (2). The primers were extended at the 5' end with barcodes for multiplexed library sequencing (3). Bacterial and fungal primer pairs, respectively, amplified the V3/V4 region of the bacterial 16S rRNA and the fungal internal transcribed spacer 2 (ITS2) region. PCR reactions were performed on GeneAmp PCR System 9700 thermal cycler (Thermo Fisher Scientific). Each 16S PCR was performed in a reaction mixture of 25 µl consisting of 1× PCR reaction buffer, 1.5 mM MgCl<sub>2</sub>, 0.2 mM dNTPs, 1 µM of each primer, 1 U of GoTaq Flexi polymerase (Promega Corporation, Madison, USA), and 1 µl of DNA template. Thermal cycling conditions are as follows; 94 °C for 5 min, followed by 25 cycles at 94 °C for 30 s, 55 °C for 30 s, 72 °C for 1 min, and a final elongation step at 72 °C for 10 min. The fungal (ITS) libraries were prepared similarly, except that we used an annealing temperature of 57 °C as recommended (1). Dual indexing in combination with internal barcodes was carried out to allow pooling of samples. For indexing, primers including indexing tags were used in a PCR for 10 cycles, with the thermal cycler programs as described

above. In addition to dual indexing, a varying number of nucleotides were added to the forward primer as internal barcodes for combining samples within each index combination [2, 4]. Primer sequences including internal barcodes and the index combinations are described in (5).

The PCR amplicon sizes were confirmed by visualization in a 1.5% agarose gel using SYBR staining, and the PCR products subsequently pooled, precipitated, and re-eluted as described earlier (6). In order to extract the expected size of the amplicons (300–450 bp) and to avoid shorter reads, the pooled DNA was separated on a 1.5% agarose gel and the band of the expected size was extracted using a QIAquick Gel Extraction Kit (Qiagen). The final concentration of the amplicon library was evaluated using a spectrophotometer. Two sequencing libraries, one each for bacteria and fungi were sequenced using the Illumina MiSeq platform at Eurofins MWG (Ebersberg, Germany). All the sequence files were deposited in the NCBI Sequence Read Archive (SRA) under the accession number PRJNA579829.

## References

1. Ihrmark K., Bödeker I.T.M., Cruz-Martinez K., Friberg H., Kubartova A., Schenck J., ... Lindahl B.D. (2012). New primers to amplify the fungal ITS2 region--evaluation by 454-sequencing of artificial and natural communities. *FEMS Microbiology Ecology*, 82, 666–77.
2. Siddique A.B., & Unterseher M. (2016). A cost-effective and efficient strategy for Illumina sequencing of fungal communities: A case study of beech endophytes identified elevation as main explanatory factor for diversity and community composition. *Fungal Ecology*, 20, 175–85.
3. Kudjordjie E.N., Sapkota R., Steffensen S.K., Fomsgaard I.S., & Nicolaisen M. (2019). Maize synthesized benzoxazinoids affect the host associated microbiome. *Microbiome*, 1–17.
4. Wu L., Wen C., Qin Y., Yin H., Tu Q., Van Nostrand J.D., ... Zhou J. (2015). Phasing amplicon sequencing on Illumina Miseq for robust environmental microbial community analysis. *BMC Microbiology*, 15(125), 1-12.
5. McMurdie P.J., Holmes S., Kindt R., Legendre P., & O'Hara R. (2013). phyloseq: An R package for reproducible interactive analysis and graphics of microbiome census data. *PLoS One*, 8(4), e61217.
6. Sapkota R., & Nicolaisen M. (2018). Cropping history shapes fungal, oomycete and nematode communities in arable soils and affects cavity spot in carrot. *Agriculture, Ecosystems & Environment*, 257, 120–31.

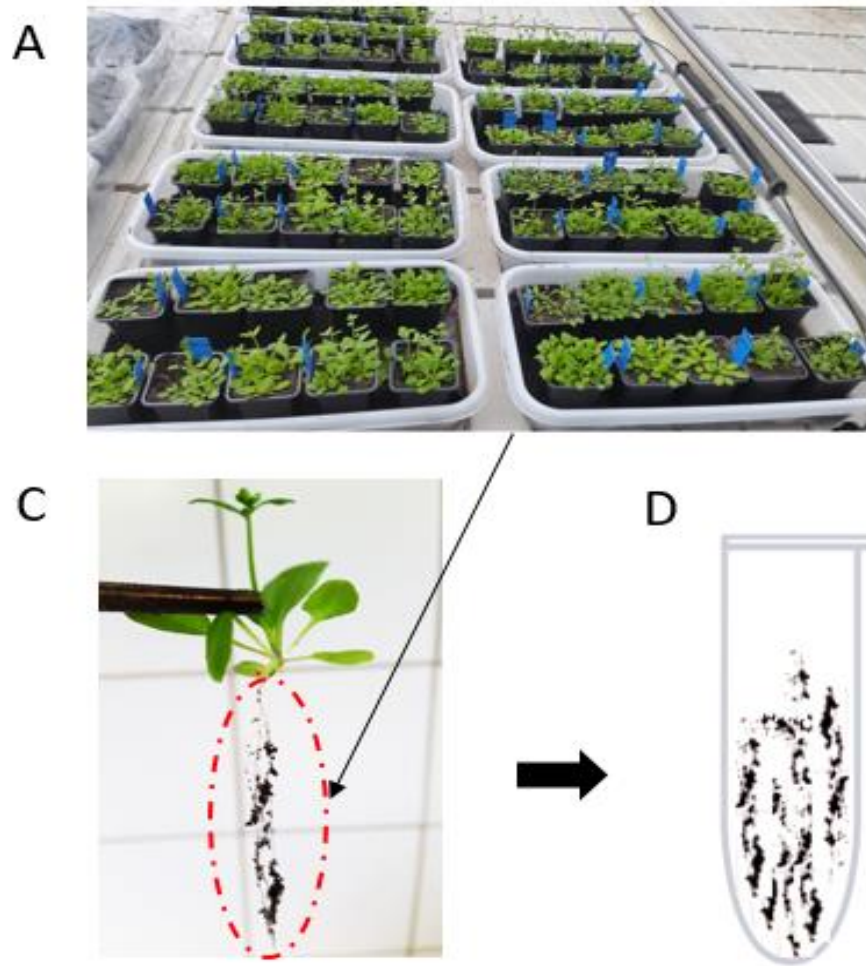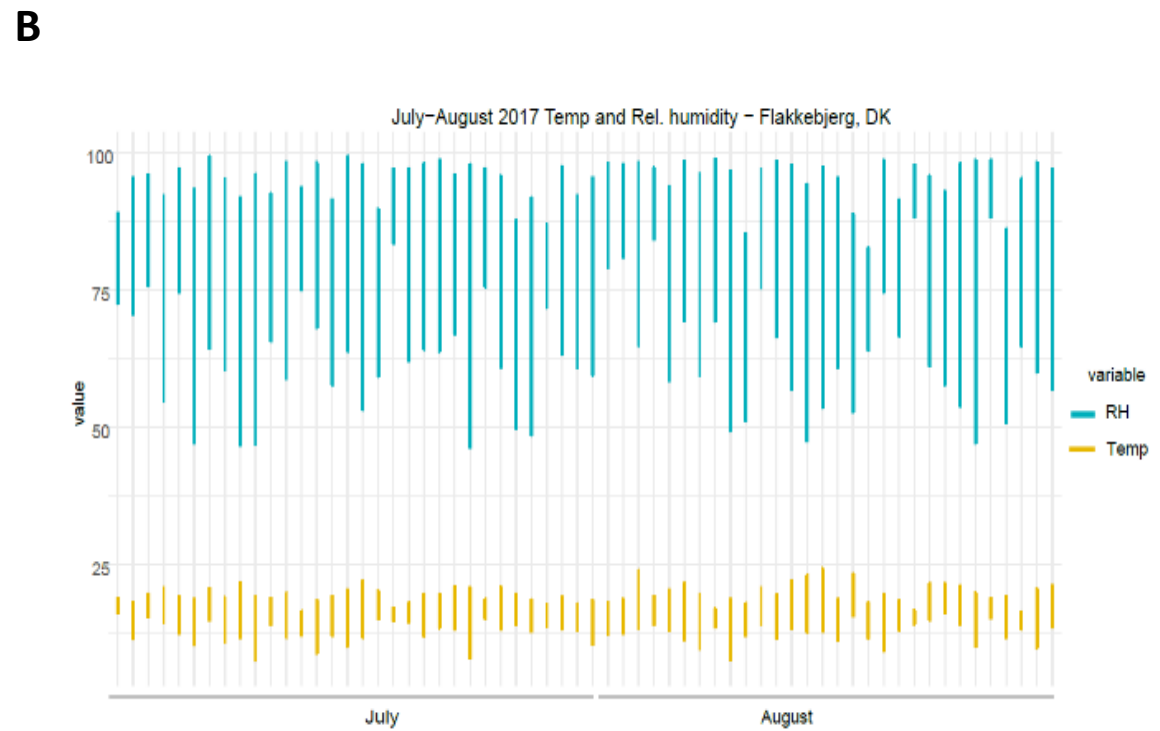

**Figure S1.** Arabidopsis growth and harvesting scheme. **A)** Arabidopsis growing under greenhouse conditions. **B)** Summer conditions (July-August temperature and relative humidity (RH) for the growth of Arabidopsis in greenhouses. Each bar represent daily readings (at hourly intervals) (Source: DMI Dalmoose Station). **C)** Arabidopsis with the roots (circled in red), the part harvested for analysis **D)** Root samples from individual plants in same pots were pooled into in a collection tube (representing a replicate) and subsequently frozen.

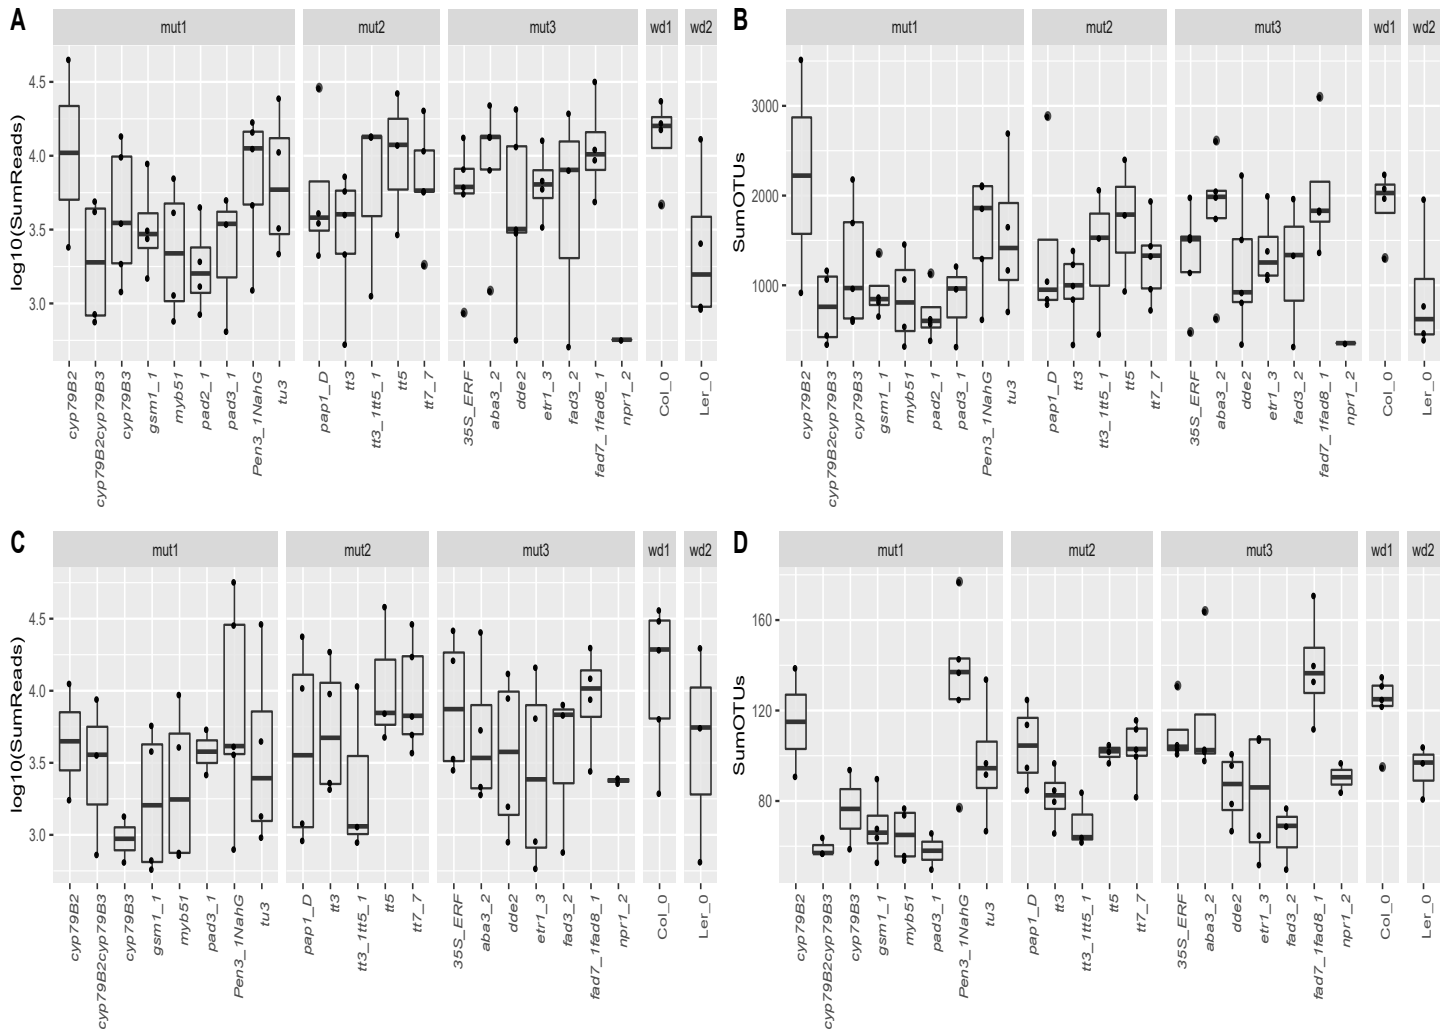

**Figure S2.** Box plots showing the distribution of number of reads and OTU distribution after pruning in each sample used in this study. Bacterial reads (A) and OTU distribution (B) and the fungal reads (C) and OTU distribution (D).

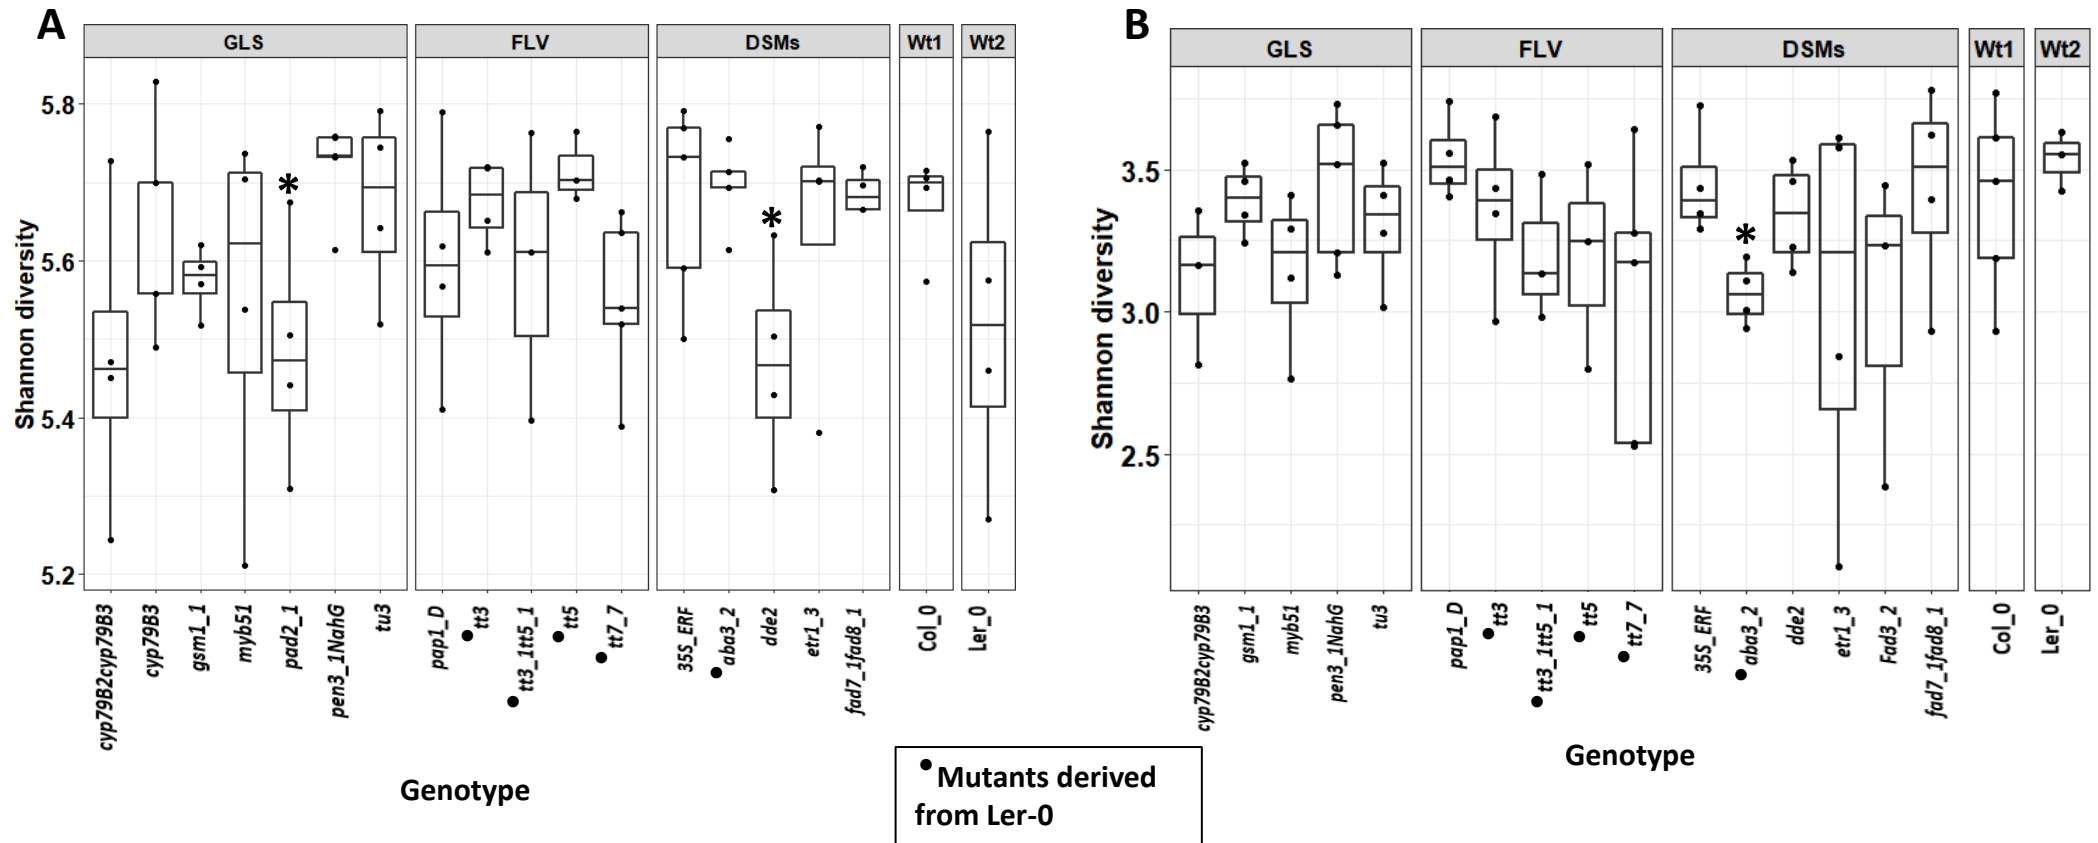

**Figure S3.** Alpha diversity (Shannon) of bacterial (A) and fungal (B) communities in roots of Arabidopsis secondary metabolite and signalling mutants and their parental lines (Col\_0 and Ler-0). Significant differences in alpha diversity in secondary metabolite and signalling mutants and their parental lines are indicated as \*, \*\*, and \*\*\* for  $P < 0.05$ ,  $< 0.01$  and  $< 0.001$  respectively. Analysis was performed using the Kruskal- Wallis test.

## Supplementary tables

**Table S1. List of Arabidopsis accessions used for the experiment**

| Sample ID        | Genotype              | Sample type | Description                                                                                                                                                                                                                                                                                                                                                                                                                                             | Source/reference                                                                             |
|------------------|-----------------------|-------------|---------------------------------------------------------------------------------------------------------------------------------------------------------------------------------------------------------------------------------------------------------------------------------------------------------------------------------------------------------------------------------------------------------------------------------------------------------|----------------------------------------------------------------------------------------------|
| <b>GLS</b>       |                       |             |                                                                                                                                                                                                                                                                                                                                                                                                                                                         |                                                                                              |
| 22625            | Col_0                 | Wildtype    | Reference control                                                                                                                                                                                                                                                                                                                                                                                                                                       | NASC                                                                                         |
| cyp79B2          | <i>cyp79B2</i>        | mutant      | partial IGS synthesis                                                                                                                                                                                                                                                                                                                                                                                                                                   | Prof. J. Bender, Mikkelsen et al., 2000, Hull et al., 2000                                   |
| cyp79B3          | <i>cyp79B3</i>        | mutant      | partial IGS synthesis                                                                                                                                                                                                                                                                                                                                                                                                                                   | Prof. J. Bender, Hull et al., 2000, Zhao et al., 2002                                        |
| cyp79B279B3      | <i>cyp79B2cyp79B3</i> | mutant      | Total disruption of IGS and camalexin synthesis                                                                                                                                                                                                                                                                                                                                                                                                         | Prof. J. Bender, Mikkelsen et al., 2000, Hull et al., 2000                                   |
| N2226            | <i>gsm1-1 (TUI)</i>   | mutant      | Low amino acid substrate required for GLS synthesis. Reduced levels of many aliphatic glucosinolates                                                                                                                                                                                                                                                                                                                                                    | NASC, (Haughn et al., 1991)                                                                  |
| N2228            | <i>tu3</i>            | mutant      | Low amino acid substrate required for GLS synthesis. Deficient in aliphatic GLS with heptyl and octyl core groups.                                                                                                                                                                                                                                                                                                                                      | NASC, Haughn et al., 1991                                                                    |
| N56602           | <i>myb51</i>          | mutant      | IGS synthesis disruption                                                                                                                                                                                                                                                                                                                                                                                                                                | NASC, Frerigmann et al., 2014                                                                |
| N67803           | <i>Pen3-1NahG</i>     | mutant      | Disruption in both IGS synthesis and SA signaling pathways. PEN3 encodes a pleiotropic drug resistance (PDR) ATP-binding cassette (ABC) transporter involved in the secretion of antimicrobial products, including those resulting from PEN2 activity; a myrosinase (enzyme) that initiates the induction of tryptophan-derived IGS. NahG gene that encodes salicylate hydroxylase (converts SA to catechol) NahG gene suppress expression of PR genes. | NASC, Bednarek et al., 2009; Stein et al., 2006. Yamamoto et al., 1965 Delaney et al., 1994. |
| <b>Camalexin</b> |                       |             |                                                                                                                                                                                                                                                                                                                                                                                                                                                         |                                                                                              |
| N3804            | <i>pad2-1</i>         | mutant      | Partial camalexin deficient                                                                                                                                                                                                                                                                                                                                                                                                                             | NASC, Schlaeppi et al., 2008                                                                 |
| N3805            | <i>pad3-1</i>         | mutant      | Total camalexin deficient                                                                                                                                                                                                                                                                                                                                                                                                                               | NASC, Glawischnig et al., 2006, Schuhegger et al., 2007                                      |
| <b>FLV</b>       |                       |             |                                                                                                                                                                                                                                                                                                                                                                                                                                                         |                                                                                              |
| tt3              | <i>tt3</i>            | mutant      | Accumulates excess amounts of quercetin and kaempferol                                                                                                                                                                                                                                                                                                                                                                                                  | Peer et al., 2001, Dong et al., 2001                                                         |
| tt5              | <i>tt5</i>            | mutant      | Low-level quercetin production                                                                                                                                                                                                                                                                                                                                                                                                                          | Peer et al., 2001                                                                            |
| N2105578         | <i>tt7-7</i>          | mutant      | Deficient in flavonoid 3'-hydroxylase activity and lacks orthodihydroxy flavonoids such as quercetin deficient and kaempferol                                                                                                                                                                                                                                                                                                                           | NASC, Rosso et al., 2003, Appelhagen et al., 2014                                            |
| N8596            | <i>tt3-1tt5_1</i>     | mutant      | Double mutation, disruption of the synthesis of brown pigment                                                                                                                                                                                                                                                                                                                                                                                           | NASC, Peer et al., 2001                                                                      |
| N3884            | <i>pap1-D</i>         | mutant      | Overexpressed mutant                                                                                                                                                                                                                                                                                                                                                                                                                                    | NASC, Shulz et al., 2016, Borevitz et al., 2000                                              |

| DSMs  |                     |          |                                                                                                                                                           |                                                                     |
|-------|---------------------|----------|-----------------------------------------------------------------------------------------------------------------------------------------------------------|---------------------------------------------------------------------|
| dde2  | <i>dde2</i>         | mutant   | JA deficient                                                                                                                                              | Staswich et al., 1998                                               |
| N158  | <i>aba3-2</i>       | mutant   | ABA deficient                                                                                                                                             | NASC, refs: Leon-Kloosterziel et al. (1996), Schwartz et al. (1997) |
| N3070 | <i>etr1-3</i>       | mutant   | Ethylene responsive                                                                                                                                       | NASC; ref: Woeste et al. (1999), Negi et al. (2008), Binder (2020)  |
| N3801 | <i>npr1-2</i>       | mutant   | SA impaired                                                                                                                                               | NASC, ref: Spoel et al. (2003)                                      |
| N6143 | <i>35S::ERF</i>     | mutant   | Ethylene (overexpressed)                                                                                                                                  | NASC, Solano et al., 1998                                           |
| N8034 | <i>fad3-2</i>       | mutant   | Fatty acid desaturase (FAD) deficient (deficient in lineolate desaturase, 18:2; deficient in endoplasmic reticulum lipids; no visible phenotypic effects) | NASC, ref; Browse et al. (1993)                                     |
| N8036 | <i>fad7-1fad8-1</i> | mutant   | FAD double mutant (linoleic acid overproducer; linolenic acid underproducer.                                                                              | NASC, ref: Mcconn et al. (1994)                                     |
| NW20  | Ler-0               | Wildtype | Reference control                                                                                                                                         | NASC                                                                |

The FLV mutants (tt lines) used in this study had a defective proanthocyanidin accumulation resulting in a transparent testa (tt) phenotype characterized by a yellowish or pale brown colour (29). NASC\* Nottingham Arabidopsis Stock Centre. \* I3AOx (Indole-3-aldoxime), \*IGS (indole glucosinolate), \*ABA (Abscisic acid), \*SA (salicylic acid).

## References

1. Appelhagen I, Thiedig K, Nordholt N, Schmidt N, Huep G, Sagasser M, et al. Update on transparent testa mutants from *Arabidopsis thaliana*: characterisation of new alleles from an isogenic collection. *Planta* 2014; 240: 955–970.
2. Bednarek P., Piślewska-bednarek M., Svatoš A., Schneider B., Mansurova M., Humphry M., ... Schulze-Lefert P. A glucosinolate metabolism pathway in living plant cells mediates broad-spectrum antifungal defense. *Science*. 2009; 323, 101–6.
3. Borevitz JO, Xia Y, Blount J, Dixon RA, Lamb C: Activation tagging identifies a conserved MYB regulator of phenylpropanoid biosynthesis. *Plant Cell*. 2000; 12:2383-2394.3.
4. Delaney T.P., Uknes S., Vernooij B., Friedrich L., Weymann K., Negrotto D., ... Ryas J. A central role of salicylic acid in plant disease resistance. *Science*. 1994; 266, 1247–50. Dong XY, Braun EL, Grotewold E: Functional conservation of plant secondary metabolic enzymes revealed by complementation of *Arabidopsis* flavonoid mutants with maize genes. *Plant Physiol*. 2001; 127:46-57.
5. Frerigmann H, Gigolashvili T: MYB34, MYB51, and MYB122 distinctly regulate indolic glucosinolate biosynthesis in *Arabidopsis thaliana*. *Mol Plant*. 2014, 7:814-828.

6. Glawischnig E: The role of cytochrome P450 enzymes in the biosynthesis of camalexin. *Biochem. Soc. Trans.* 2006; 34:1206-1208.
7. Haughn G.W., Davin L., Giblin M., & Underhill E.W. Biochemical genetics of plant secondary metabolites in *Arabidopsis thaliana*. *Plant Physiol.* 1991; 217–26.
8. Hull AK, Vij R, Celenza JL: Arabidopsis cytochrome P450s that catalyze the first step of tryptophan-dependent indole-3-acetic acid biosynthesis. *Proc Natl Acad Sci.* 2000; 97:2379-2384.
9. Mikkelsen MD, Hansen CH, Wittstock U, Halkier BA: Cytochrome P450CYP79B2 from Arabidopsis catalyzes the conversion of tryptophan to indole-3-acetaldoxime, a precursor of indole glucosinolates and indole-3-acetic acid. *J. Biol. Chem.* 2000; 275:33712-33717.
10. Peer WA, Brown DE, Tague BW, Muday GK, Taiz L, Murphy AS: Flavonoid accumulation patterns of transparent testa mutants of Arabidopsis. *Plant Physiol.* 2001, 126:536-548.
11. Rosso MG, Li Y, Strizhov N, Reiss B, Dekker K, Weisshaar B. An Arabidopsis thaliana T-DNA mutagenized population (GABI-Kat) for flanking sequence tag-based reverse genetics. *Plant Mol Biol* 2003; 53: 247–259.
12. Schlaeppi K, Bodenhausen N, Buchala A, Mauch F, Reymond P: The glutathione-deficient mutant pad2-1 accumulates lower amounts of glucosinolates and is more susceptible to the insect herbivore *Spodoptera littoralis*. *Plant J.* 2008, 55:774-786.
13. Schuegger R, Nafisi M, Mansourova M, Petersen BL, Olsen CE, Svatos A, Halkier BA, Glawischnig E: CYP71B15 (PAD3) catalyzes the final step in camalexin biosynthesis - Correction. *Plant Physiol.* 2007, 145:1086-1086.
14. Schulz E, Tohge T, Zuther E, Fernie AR, Hinch DK: Flavonoids are determinants of freezing tolerance and cold acclimation in *Arabidopsis thaliana*. *Sci. Rep.* 2016, 6.
15. Shirley B.W., Kubasek W.L., Storz G., Bruggemann E., Koornneef M., Ausubel FM., ... Goodman H.M. Analysis of Arabidopsis mutants deficient in flavonoid biosynthesis. *Plant J.* 1995; 8, 659–71.
16. Stein M., Dittgen J., Sánchez-Rodríguez C., Hou B.H., Molina A., Schulze-Lefert P., ... Somerville S. Arabidopsis PEN3/PDR8, an ATP binding cassette transporter, contributes to nonhost resistance to inappropriate pathogens that enter by direct penetration. *Plant Cell.* 2006; 18, 731–46.
17. Yamamoto S, Katagiri M, Maeno H, & Hayaishi O. Salicylate hydroxylase, a monooxygenase requiring flavin adenine. *J. Biol. Chem.* 1965; 240:3414–7.



18. Zhao YD, Hull AK, Gupta NR, Goss KA, Alonso J, Ecker JR, Normanly J, Chory J, Celenza JL: Trp-dependent auxin biosynthesis in Arabidopsis: involvement of cytochrome P450s CYP79B2 and CYP79B3. *Genes & Dev.* 2002; 16:3100-3112.

**Table S2: Mean, median and range of reads per genotype groups for fungal and bacterial libraries.**

|          | mean | median | min | max   |
|----------|------|--------|-----|-------|
| Bacteria | 6365 | 3277   | 7   | 44934 |
| Fungi    | 6187 | 1762   | 26  | 57210 |

**Table S3: Differences in alpha diversity in secondary metabolite and signaling mutants and their control. Analysis was performed using the Kruskal-Wallis test.**

| Dataset/factor               | Bacteria |         | Fungi    |         |
|------------------------------|----------|---------|----------|---------|
|                              | observed | Shannon | observed | Shannon |
| <b>GLS</b>                   |          |         |          |         |
| Col_0; <i>cyp79B3</i>        | 0.04*    | n.s     | --       | --      |
| Col_0; <i>cyp79B2cyp79B3</i> | n.s      | n.s     | 0.025*   | n.s     |
| Col_0; <i>myb51</i>          | n.s      | n.s     | 0.01*    | n.s     |
| Col_0; <i>gsm1_1</i>         | 0.02*    | n.s     | n.s      | n.s     |
| Col_0; <i>tu3</i>            | n.s      | n.s     | n.s      | n.s     |
| Col_0; <i>pad2_1</i>         | 0.04*    | 0.04*   | --       | --      |
| Col_0; <i>Pen3_1NahG</i>     | n.s      | n.s     | n.s      | n.s     |
| <b>FLVs</b>                  |          |         |          |         |
| Ler_0; <i>tt7_7</i>          | n.s      | n.s     | n.s      | n.s     |
| Ler_0; <i>tt3</i>            | n.s      | n.s     | 0.03*    |         |
| Ler_0; <i>tt5</i>            | n.s      | n.s     | 0.049*   |         |
| Ler_0; <i>tt3_1tt5_1</i>     | n.s      | n.s     | 0.049*   |         |
| Col_0; <i>pap1_D</i>         | n.s      | n.s     | n.s      | n.s     |
| <b>DSMs</b>                  |          |         |          |         |
| Col_0; <i>dde2</i>           | 0.04*    | 0.04*   | n.s      | n.s     |

|                            |     |     |       |       |
|----------------------------|-----|-----|-------|-------|
| Ler_0; <i>aba3_2</i>       | n.s | n.s | n.s   | 0.03* |
| Col_0; <i>etr1_3</i>       | n.s | n.s | n.s   | n.s   |
| Col_0; <i>35S_ERF</i>      | n.s | n.s | n.s   | n.s   |
| Col_0; <i>fad3_2</i>       | --  | --  | 0.03* | n.s   |
| Col_0; <i>fad7_1fad8_1</i> | n.s | n.s | n.s   | n.s   |

Significance of test indicated as \*\*\* for  $p < 0.001$ , \*\*  $p < 0.01$ , \* $p < 0.05$

**Table S4: Multivariate analysis of the deviance of generalized linear models fitting bacterial otus to secondary metabolite and signaling mutants genotypes.**

| Dataset | Factor    |  | Res.Df | Df.diff | Dev   | Dev Pr(>Dev) |
|---------|-----------|--|--------|---------|-------|--------------|
| GLSmut  | Intercept |  | 33     |         | 19637 | 0.001 ***    |
|         | Genotype  |  | 26     | 7       |       |              |
| FLV     | Intercept |  | 18     |         | 10966 | 0.001 ***    |
|         | Genotype  |  | 14     | 4       |       |              |
| DSM     | Intercept |  | 20     |         | 11596 | 0.001 ***    |
|         | Genotype  |  | 16     | 4       |       |              |

Signif. codes: 0 '\*\*\*' 0.001 '\*\*' 0.01 '\*' 0.05

**Table S5: Multivariate analysis of the deviance of generalized linear models fitting fungal otus to secondary metabolite and signaling mutants and control genotypes.**

| Dataset | Factor    | Res.Df | Df.diff | Dev  | Dev Pr(>Dev) |
|---------|-----------|--------|---------|------|--------------|
| GLS     | Intercept | 24     |         | 1997 | 0.001 ***    |
|         | Genotype  | 19     | 5       |      |              |
| FLV     | Intercept | 17     |         | 1534 | 0.001 ***    |
|         | Genotype  | 13     | 4       |      |              |
| DSM     | Intercept | 23     |         | 1950 | 0.001 ***    |
|         | Genotype  | 18     | 5       |      |              |

Signif. codes: 0 '\*\*\*' 0.001 '\*\*' 0.01 '\*' 0.05

**Table S6: Proportional abundance (in percentage) of differentially affected genera in microbiome**

| Dataset |          | Bacteria | Fungi |
|---------|----------|----------|-------|
| GLSs    | Enriched | 7.39     | 12.98 |
|         | Depleted | 4.63     | 3.89  |
|         | Total    | 12.02    | 16.87 |
| FLVs    | Enriched | 2.74     | 10.09 |
|         | Depleted | 1.49     | 13.53 |
|         | Total    | 4.23     | 23.62 |
| DSMs    | Enriched | 11.04    | 27.85 |
|         | Depleted | 9.21     | 3.52  |
|         | Total    | 20.25    | 31.37 |

**Table S7: Differentially abundant root bacterial OTUs of Col\_0 and GLS mutants as determined using DESeq2.**

| otu      | FoldChange   | Class          | Family             | Genus                 | Species              | WT_Mutant            | Mutant                | Taxonomy_OTU                                  |
|----------|--------------|----------------|--------------------|-----------------------|----------------------|----------------------|-----------------------|-----------------------------------------------|
| OTU_103  | -4.542349509 | Bacteroidia    | Crocinitomicaceae  | Fluviicola            | NA                   | Col_0_cyp79B3        | <i>cyp79B3</i>        | Bacteroidia;Fluviicola;OTU_103                |
| OTU_103  | -5.420224198 | Bacteroidia    | Crocinitomicaceae  | Fluviicola            | NA                   | Col_0_cyp79B2cyp79B3 | <i>cyp79B2cyp79B3</i> | Bacteroidia;Fluviicola;OTU_103                |
| OTU_103  | -4.937442654 | Bacteroidia    | Crocinitomicaceae  | Fluviicola            | NA                   | Col_0_myb51          | <i>myb51</i>          | Bacteroidia;Fluviicola;OTU_103                |
| OTU_103  | -6.035289414 | Bacteroidia    | Crocinitomicaceae  | Fluviicola            | NA                   | Col_0_gsm1_1         | <i>gsm1_1</i>         | Bacteroidia;Fluviicola;OTU_103                |
| OTU_103  | -4.500402596 | Bacteroidia    | Crocinitomicaceae  | Fluviicola            | NA                   | Col_0_TU3            | <i>TU3</i>            | Bacteroidia;Fluviicola;OTU_103                |
| OTU_103  | -5.371838741 | Bacteroidia    | Crocinitomicaceae  | Fluviicola            | NA                   | Col_0_pad2_1         | <i>pad2_1</i>         | Bacteroidia;Fluviicola;OTU_103                |
| OTU_116  | 2.467139904  | Subgroup 6     | NA                 | NA                    | NA                   | Col_0_TU3            | <i>TU3</i>            | Subgroup 6;NA;OTU_116                         |
| OTU_1249 | 3.431695936  | Acidimicrobiia | Ilumatobacteraceae | CL500-29 marine group | NA                   | Col_0_myb51          | <i>myb51</i>          | Acidimicrobiia;CL500-29 marine group;OTU_1249 |
| OTU_13   | -1.425399429 | Actinobacteria | Nocardioidaceae    | Nocardioides          | Ambiguous_taxa       | Col_0_cyp79B3        | <i>cyp79B3</i>        | Actinobacteria;Nocardioides;OTU_13            |
| OTU_13   | -1.950023779 | Actinobacteria | Nocardioidaceae    | Nocardioides          | Ambiguous_taxa       | Col_0_TU3            | <i>TU3</i>            | Actinobacteria;Nocardioides;OTU_13            |
| OTU_13   | -3.506744447 | Actinobacteria | Nocardioidaceae    | Nocardioides          | uncultured bacterium | Col_0_cyp79B3        | <i>cyp79B3</i>        | Actinobacteria;Nocardioides;OTU_13            |
| OTU_13   | -4.041682424 | Actinobacteria | Nocardioidaceae    | Nocardioides          | uncultured bacterium | Col_0_TU3            | <i>TU3</i>            | Actinobacteria;Nocardioides;OTU_13            |
| OTU_140  | -1.931579563 | Thermoleophila | uncultured         | NA                    | NA                   | Col_0_TU3            | <i>TU3</i>            | Thermoleophila;NA;OTU_140                     |
| OTU_149  | -2.683288697 | Actinobacteria | Frankiaceae        | Jatrophihabitans      | Ambiguous_taxa       | Col_0_TU3            | <i>TU3</i>            | Actinobacteria;Jatrophihabitans;OTU_149       |

|          |              |                     |                        |                         |                      |                      |                       |                                                  |
|----------|--------------|---------------------|------------------------|-------------------------|----------------------|----------------------|-----------------------|--------------------------------------------------|
| OTU_16   | -1.253806548 | Actinobacteria      | Streptomycetaceae      | Streptomyces            | NA                   | Col_0_cyp79B3        | <i>cyp79B3</i>        | Actinobacteria;Streptomyces;OTU_16               |
| OTU_16   | -1.7159077   | Actinobacteria      | Streptomycetaceae      | Streptomyces            | NA                   | Col_0_cyp79B2cyp79B3 | <i>cyp79B2cyp79B3</i> | Actinobacteria;Streptomyces;OTU_16               |
| OTU_16   | -1.561806197 | Actinobacteria      | Streptomycetaceae      | Streptomyces            | NA                   | Col_0_pad2_1         | <i>pad2_1</i>         | Actinobacteria;Streptomyces;OTU_16               |
| OTU_17   | 1.840243359  | Alphaproteobacteria | Rhizobiaceae           | ANP_Rhizobium           | NA                   | Col_0_cyp79B3        | <i>cyp79B3</i>        | Alphaproteobacteria;ANP_Rhizobium;OTU_17         |
| OTU_171  | 1.767400207  | Planctomycetacia    | Gemmataceae            | Gemmata                 | uncultured bacterium | Col_0_cyp79B3        | <i>cyp79B3</i>        | Planctomycetacia;Gemmata;OTU_171                 |
| OTU_178  | -2.303724324 | Actinobacteria      | Sporichthyaceae        | NA                      | uncultured bacterium | Col_0_TU3            | <i>TU3</i>            | Actinobacteria;NA;OTU_178                        |
| OTU_18   | 1.541634276  | Phycisphaerae       | WD2101 soil group      | NA                      | uncultured bacterium | Col_0_cyp79B3        | <i>cyp79B3</i>        | Phycisphaerae;NA;OTU_18                          |
| OTU_192  | -1.810123746 | Thermoleophilia     | uncultured             | NA                      | uncultured bacterium | Col_0_cyp79B3        | <i>cyp79B3</i>        | Thermoleophilia;NA;OTU_192                       |
| OTU_20   | 1.199038787  | Verrucomicrobiae    | Chthoniobacteraceae    | Cand. Udaeobacter       | Ambiguous_taxa       | Col_0_myb51          | <i>myb51</i>          | Verrucomicrobiae;Cand. Udaeobacter;OTU_20        |
| OTU_201  | 7.822042756  | Bacteroidia         | Crocinitomicaceae      | Fluviicola              | uncultured bacterium | Col_0_cyp79B3        | <i>cyp79B3</i>        | Bacteroidia;Fluviicola;OTU_201                   |
| OTU_202  | 1.472077138  | Verrucomicrobiae    | Chthoniobacteraceae    | Cand. Udaeobacter       | Ambiguous_taxa       | Col_0_TU3            | <i>TU3</i>            | Verrucomicrobiae;Cand. Udaeobacter;OTU_202       |
| OTU_230  | -2.252969729 | Gammaproteobacteria | Rhodanobacteraceae     | Rhodanobacter           | NA                   | Col_0_Pen3_1NahG     | <i>Pen3_1NahG</i>     | Gammaproteobacteria;Rhodanobacter;OTU_230        |
| OTU_248  | 3.524395175  | Bacteroidia         | Chitinophagaceae       | Niastella               | uncultured bacterium | Col_0_gsm1_1         | <i>gsm1_1</i>         | Bacteroidia;Niastella;OTU_248                    |
| OTU_28   | -1.919346745 | Actinobacteria      | Intrasporangiaceae     | Terrabacter             | Ambiguous_taxa       | Col_0_TU3            | <i>TU3</i>            | Actinobacteria;Terrabacter;OTU_28                |
| OTU_28   | -1.177575235 | Actinobacteria      | Intrasporangiaceae     | Terrabacter             | Ambiguous_taxa       | Col_0_Pen3_1NahG     | <i>Pen3_1NahG</i>     | Actinobacteria;Terrabacter;OTU_28                |
| OTU_283  | 1.827177161  | Verrucomicrobiae    | Xiphinematobacteraceae | Cand. Xiphinematobacter | uncultured bacterium | Col_0_cyp79B2cyp79B3 | <i>cyp79B2cyp79B3</i> | Verrucomicrobiae;Cand. Xiphinematobacter;OTU_283 |
| OTU_283  | 2.10160609   | Verrucomicrobiae    | Xiphinematobacteraceae | Cand. Xiphinematobacter | uncultured bacterium | Col_0_myb51          | <i>myb51</i>          | Verrucomicrobiae;Cand. Xiphinematobacter;OTU_283 |
| OTU_296  | 3.072930199  | Verrucomicrobiae    | Verrucomicrobiaceae    | Roseimicrobium          | NA                   | Col_0_cyp79B2cyp79B3 | <i>cyp79B2cyp79B3</i> | Verrucomicrobiae;Roseimicrobium;OTU_296          |
| OTU_30   | -1.472208325 | Bacteroidia         | Chitinophagaceae       | NA                      | uncultured bacterium | Col_0_Pen3_1NahG     | <i>Pen3_1NahG</i>     | Bacteroidia;NA;OTU_30                            |
| OTU_302  | 2.405990292  | Planctomycetacia    | Isosphaeraceae         | Singulisphaera          | Ambiguous_taxa       | Col_0_cyp79B3        | <i>cyp79B3</i>        | Planctomycetacia;Singulisphaera;OTU_302          |
| OTU_318  | -3.107578425 | Gammaproteobacteria | Burkholderiaceae       | Massilia                | uncultured bacterium | Col_0_cyp79B3        | <i>cyp79B3</i>        | Gammaproteobacteria;Massilia;OTU_318             |
| OTU_318  | -2.81418065  | Gammaproteobacteria | Burkholderiaceae       | Massilia                | uncultured bacterium | Col_0_TU3            | <i>TU3</i>            | Gammaproteobacteria;Massilia;OTU_318             |
| OTU_331  | 4.004059832  | Gammaproteobacteria | Pseudomonadaceae       | Pseudomonas             | Ambiguous_taxa       | Col_0_cyp79B2cyp79B3 | <i>cyp79B2cyp79B3</i> | Gammaproteobacteria;Pseudomonas;OTU_331          |
| OTU_331  | 2.871631158  | Gammaproteobacteria | Pseudomonadaceae       | Pseudomonas             | Ambiguous_taxa       | Col_0_pad2_1         | <i>pad2_1</i>         | Gammaproteobacteria;Pseudomonas;OTU_331          |
| OTU_331  | 3.078411729  | Gammaproteobacteria | Pseudomonadaceae       | Pseudomonas             | Ambiguous_taxa       | Col_0_Pen3_1NahG     | <i>Pen3_1NahG</i>     | Gammaproteobacteria;Pseudomonas;OTU_331          |
| OTU_339  | 1.429228846  | Planctomycetacia    | uncultured             | NA                      | Ambiguous_taxa       | Col_0_cyp79B3        | <i>cyp79B3</i>        | Planctomycetacia;NA;OTU_339                      |
| OTU_339  | 2.206495622  | Planctomycetacia    | uncultured             | Ambiguous_taxa          | Ambiguous_taxa       | Col_0_cyp79B2cyp79B3 | <i>cyp79B2cyp79B3</i> | Planctomycetacia;Ambiguous_taxa;OTU_339          |
| OTU_339  | 1.722063162  | Planctomycetacia    | uncultured             | Ambiguous_taxa          | Ambiguous_taxa       | Col_0_TU3            | <i>TU3</i>            | Planctomycetacia;Ambiguous_taxa;OTU_339          |
| OTU_341  | 2.583272644  | Planctomycetacia    | Pirellulaceae          | Pirellula               | uncultured bacterium | Col_0_gsm1_1         | <i>gsm1_1</i>         | Planctomycetacia;Pirellula;OTU_341               |
| OTU_3486 | -2.27302632  | Actinobacteria      | Intrasporangiaceae     | Lapillicoccus           | NA                   | Col_0_cyp79B3        | <i>cyp79B3</i>        | Actinobacteria;Lapillicoccus;OTU_3486            |

|          |              |                     |                     |                    |                             |                      |                       |                                                |
|----------|--------------|---------------------|---------------------|--------------------|-----------------------------|----------------------|-----------------------|------------------------------------------------|
| OTU_3486 | -1.776400889 | Actinobacteria      | Intrasporangiaceae  | Lapillicoccus      | NA                          | Col_0_cyp79B2cyp79B3 | <i>cyp79B2cyp79B3</i> | Actinobacteria;Lapillicoccus;OTU_3486          |
| OTU_3486 | -1.86520495  | Actinobacteria      | Intrasporangiaceae  | Lapillicoccus      | NA                          | Col_0_pad2_1         | <i>pad2_1</i>         | Actinobacteria;Lapillicoccus;OTU_3486          |
| OTU_3486 | -1.644846185 | Actinobacteria      | Intrasporangiaceae  | Lapillicoccus      | NA                          | Col_0_myb51          | <i>myb51</i>          | Actinobacteria;Lapillicoccus;OTU_3486          |
| OTU_3486 | -2.048467064 | Actinobacteria      | Intrasporangiaceae  | Lapillicoccus      | NA                          | Col_0_TU3            | <i>TU3</i>            | Actinobacteria;Lapillicoccus;OTU_3486          |
| OTU_38   | 1.515570347  | Verrucomicrobiae    | Chthoniobacteraceae | Cand. Udaeobacter  | NA                          | Col_0_TU3            | <i>TU3</i>            | Verrucomicrobiae;Cand. Udaeobacter;OTU_38      |
| OTU_38   | 1.595455165  | Verrucomicrobiae    | Chthoniobacteraceae | Cand. Udaeobacter  | uncultured bacterium        | Col_0_TU3            | <i>TU3</i>            | Verrucomicrobiae;Cand. Udaeobacter;OTU_38      |
| OTU_393  | -4.476236285 | Chloroflexia        | JG30-KF-CM45        | NA                 | uncultured bacterium        | Col_0_TU3            | <i>TU3</i>            | Chloroflexia;NA;OTU_393                        |
| OTU_405  | -1.900991809 | Thermoleophilia     | 67-14               | NA                 | uncultured bacterium        | Col_0_cyp79B3        | <i>cyp79B3</i>        | Thermoleophilia;NA;OTU_405                     |
| OTU_405  | -1.774101507 | Thermoleophilia     | 67-14               | NA                 | uncultured bacterium        | Col_0_TU3            | <i>TU3</i>            | Thermoleophilia;NA;OTU_405                     |
| OTU_416  | -2.600997912 | Bacilli             | Paenibacillaceae    | Ammoniphilus       | uncultured bacterium        | Col_0_TU3            | <i>TU3</i>            | Bacilli;Ammoniphilus;OTU_416                   |
| OTU_45   | -1.901418064 | Actinobacteria      | Nocardioidaceae     | Nocardioides       | NA                          | Col_0_cyp79B3        | <i>cyp79B3</i>        | Actinobacteria;Nocardioides;OTU_45             |
| OTU_45   | -1.821604154 | Actinobacteria      | Nocardioidaceae     | Nocardioides       | NA                          | Col_0_cyp79B2cyp79B3 | <i>cyp79B2cyp79B3</i> | Actinobacteria;Nocardioides;OTU_45             |
| OTU_45   | -1.501287725 | Actinobacteria      | Nocardioidaceae     | Nocardioides       | NA                          | Col_0_myb51          | <i>myb51</i>          | Actinobacteria;Nocardioides;OTU_45             |
| OTU_45   | -1.219918718 | Actinobacteria      | Nocardioidaceae     | Nocardioides       | NA                          | Col_0_Pen3_1NahG     | <i>Pen3_1NahG</i>     | Actinobacteria;Nocardioides;OTU_45             |
| OTU_47   | 2.692821615  | Deltaproteobacteria | Myxococcaceae       | Coralloccoccus     | Ambiguous_taxa              | Col_0_pad2_1         | <i>pad2_1</i>         | Deltaproteobacteria;Coralloccoccus;OTU_47      |
| OTU_502  | 2.978902216  | Planctomycetacia    | uncultured          | NA                 | uncultured bacterium        | Col_0_cyp79B2cyp79B3 | <i>cyp79B2cyp79B3</i> | Planctomycetacia;NA;OTU_502                    |
| OTU_502  | 3.086945112  | Planctomycetacia    | uncultured          | NA                 | uncultured bacterium        | Col_0_pad2_1         | <i>pad2_1</i>         | Planctomycetacia;NA;OTU_502                    |
| OTU_517  | -6.556175447 | Gammaproteobacteria | Burkholderiaceae    | Herminiimonas      | uncultured bacterium        | Col_0_cyp79B3        | <i>cyp79B3</i>        | Gammaproteobacteria;Herminiimonas;OTU_517      |
| OTU_517  | -7.851766957 | Gammaproteobacteria | Burkholderiaceae    | Herminiimonas      | uncultured bacterium        | Col_0_Pen3_1NahG     | <i>Pen3_1NahG</i>     | Gammaproteobacteria;Herminiimonas;OTU_517      |
| OTU_519  | -5.141803869 | Gammaproteobacteria | Burkholderiaceae    | Noviherbaspirillum | uncultured bacterium        | Col_0_Pen3_1NahG     | <i>Pen3_1NahG</i>     | Gammaproteobacteria;Noviherbaspirillum;OTU_519 |
| OTU_5218 | 2.873316068  | Planctomycetacia    | uncultured          | NA                 | uncultured Planctomyces sp. | Col_0_cyp79B3        | <i>cyp79B3</i>        | Planctomycetacia;NA;OTU_5218                   |
| OTU_533  | -1.996227414 | Thermoleophilia     | 67-14               | NA                 | uncultured bacterium        | Col_0_cyp79B3        | <i>cyp79B3</i>        | Thermoleophilia;NA;OTU_533                     |
| OTU_54   | -7.987988827 | Alphaproteobacteria | Azospirillaceae     | Azospirillum       | NA                          | Col_0_cyp79B3        | <i>cyp79B3</i>        | Alphaproteobacteria;Azospirillum;OTU_54        |
| OTU_54   | -8.359625792 | Alphaproteobacteria | Azospirillaceae     | Azospirillum       | NA                          | Col_0_cyp79B2cyp79B3 | <i>cyp79B2cyp79B3</i> | Alphaproteobacteria;Azospirillum;OTU_54        |
| OTU_54   | -5.513446439 | Alphaproteobacteria | Azospirillaceae     | Azospirillum       | NA                          | Col_0_myb51          | <i>myb51</i>          | Alphaproteobacteria;Azospirillum;OTU_54        |
| OTU_54   | -8.974295342 | Alphaproteobacteria | Azospirillaceae     | Azospirillum       | NA                          | Col_0_gsm1_1         | <i>gsm1_1</i>         | Alphaproteobacteria;Azospirillum;OTU_54        |
| OTU_54   | -7.369812203 | Alphaproteobacteria | Azospirillaceae     | Azospirillum       | NA                          | Col_0_TU3            | <i>TU3</i>            | Alphaproteobacteria;Azospirillum;OTU_54        |
| OTU_54   | -8.31207967  | Alphaproteobacteria | Azospirillaceae     | Azospirillum       | NA                          | Col_0_pad2_1         | <i>pad2_1</i>         | Alphaproteobacteria;Azospirillum;OTU_54        |
| OTU_54   | -5.566068435 | Alphaproteobacteria | Azospirillaceae     | Azospirillum       | NA                          | Col_0_Pen3_1NahG     | <i>Pen3_1NahG</i>     | Alphaproteobacteria;Azospirillum;OTU_54        |
| OTU_56   | -1.706526994 | Actinobacteria      | Nocardioidaceae     | Nocardioides       | Ambiguous_taxa              | Col_0_cyp79B3        | <i>cyp79B3</i>        | Actinobacteria;Nocardioides;OTU_56             |
| OTU_56   | -1.624386021 | Actinobacteria      | Nocardioidaceae     | Nocardioides       | Ambiguous_taxa              | Col_0_myb51          | <i>myb51</i>          | Actinobacteria;Nocardioides;OTU_56             |

|          |              |                     |                     |                   |                                      |                      |                |                                               |
|----------|--------------|---------------------|---------------------|-------------------|--------------------------------------|----------------------|----------------|-----------------------------------------------|
| OTU_56   | -2.087546657 | Actinobacteria      | Nocardioidaceae     | Nocardioides      | Ambiguous_taxa                       | Col_0_TU3            | TU3            | Actinobacteria;Nocardioides;OTU_56            |
| OTU_56   | -1.146681845 | Actinobacteria      | Nocardioidaceae     | Nocardioides      | Ambiguous_taxa                       | Col_0_Pen3_1NahG     | Pen3_1NahG     | Actinobacteria;Nocardioides;OTU_56            |
| OTU_5687 | 5.521524661  | Verrucomicrobiae    | Pedosphaeraceae     | NA                | uncultured bacterium                 | Col_0_cyp79B3        | cyp79B3        | Verrucomicrobiae;NA;OTU_5687                  |
| OTU_576  | 3.90965751   | Phycisphaerae       | WD2101 soil group   | NA                | uncultured bacterium                 | Col_0_cyp79B3        | cyp79B3        | Phycisphaerae;NA;OTU_576                      |
| OTU_58   | -1.768125938 | Thermoleophilia     | 67-14               | NA                | uncultured bacterium                 | Col_0_cyp79B3        | cyp79B3        | Thermoleophilia;NA;OTU_58                     |
| OTU_58   | -1.834200722 | Thermoleophilia     | 67-14               | NA                | uncultured bacterium                 | Col_0_cyp79B2cyp79B3 | cyp79B2cyp79B3 | Thermoleophilia;NA;OTU_58                     |
| OTU_58   | -1.392777792 | Thermoleophilia     | 67-14               | NA                | uncultured bacterium                 | Col_0_gsm1_1         | gsm1_1         | Thermoleophilia;NA;OTU_58                     |
| OTU_58   | -1.490507411 | Thermoleophilia     | 67-14               | NA                | uncultured bacterium                 | Col_0_TU3            | TU3            | Thermoleophilia;NA;OTU_58                     |
| OTU_58   | -2.091850896 | Thermoleophilia     | 67-14               | NA                | uncultured bacterium                 | Col_0_pad2_1         | pad2_1         | Thermoleophilia;NA;OTU_58                     |
| OTU_6081 | 6.011093803  | Bacteroidia         | Flavobacteriaceae   | Flavobacterium    | uncultured bacterium                 | Col_0_myb51          | myb51          | Bacteroidia;Flavobacterium;OTU_6081           |
| OTU_6428 | 5.909241049  | Gammaproteobacteria | Burkholderiaceae    | Variovorax        | NA                                   | Col_0_cyp79B2cyp79B3 | cyp79B2cyp79B3 | Gammaproteobacteria;Variovorax;OTU_6428       |
| OTU_6428 | 6.159833718  | Gammaproteobacteria | Burkholderiaceae    | Variovorax        | NA                                   | Col_0_pad2_1         | pad2_1         | Gammaproteobacteria;Variovorax;OTU_6428       |
| OTU_667  | -4.772592708 | Bacteroidia         | Flavobacteriaceae   | Flavobacterium    | NA                                   | Col_0_cyp79B3        | cyp79B3        | Bacteroidia;Flavobacterium;OTU_667            |
| OTU_667  | -5.566479238 | Bacteroidia         | Flavobacteriaceae   | Flavobacterium    | NA                                   | Col_0_TU3            | TU3            | Bacteroidia;Flavobacterium;OTU_667            |
| OTU_667  | -4.410053853 | Bacteroidia         | Flavobacteriaceae   | Flavobacterium    | NA                                   | Col_0_Pen3_1NahG     | Pen3_1NahG     | Bacteroidia;Flavobacterium;OTU_667            |
| OTU_68   | -1.800104448 | Thermoleophilia     | uncultured          | NA                | uncultured bacterium                 | Col_0_TU3            | TU3            | Thermoleophilia;NA;OTU_68                     |
| OTU_70   | -2.161259645 | Actinobacteria      | Nocardioidaceae     | Nocardioides      | uncultured bacterium                 | Col_0_TU3            | TU3            | Actinobacteria;Nocardioides;OTU_70            |
| OTU_72   | -1.99864107  | Actinobacteria      | Geodermatophilaceae | Blastococcus      | uncultured bacterium                 | Col_0_TU3            | TU3            | Actinobacteria;Blastococcus;OTU_72            |
| OTU_72   | -2.623025461 | Actinobacteria      | Geodermatophilaceae | Blastococcus      | uncultured bacterium                 | Col_0_pad2_1         | pad2_1         | Actinobacteria;Blastococcus;OTU_72            |
| OTU_7238 | -4.457283601 | Verrucomicrobiae    | Verrucomicrobiaceae | Prostheco bacter  | uncultured bacterium                 | Col_0_cyp79B3        | cyp79B3        | Verrucomicrobiae;Prostheco bacter;OTU_7238    |
| OTU_7238 | -5.133967759 | Verrucomicrobiae    | Verrucomicrobiaceae | Prostheco bacter  | uncultured bacterium                 | Col_0_Pen3_1NahG     | Pen3_1NahG     | Verrucomicrobiae;Prostheco bacter;OTU_7238    |
| OTU_769  | 4.376185227  | Planctomycetacia    | Gemmataceae         | NA                | uncultured bacterium                 | Col_0_cyp79B3        | cyp79B3        | Planctomycetacia;NA;OTU_769                   |
| OTU_81   | 2.049799938  | Verrucomicrobiae    | Chthoniobacteraceae | Cand. Udaeobacter | uncultured Verrucomicrobia bacterium | Col_0_cyp79B3        | cyp79B3        | Verrucomicrobiae;Cand. Udaeobacter;OTU_81     |
| OTU_82   | -1.942821908 | Actinobacteria      | Nocardioidaceae     | Marmoricola       | Ambiguous_taxa                       | Col_0_cyp79B3        | cyp79B3        | Actinobacteria;Marmoricola;OTU_82             |
| OTU_874  | -4.719531858 | Gammaproteobacteria | Xanthomonadaceae    | Stenotrophomonas  | Stenotrophomonas maltophilia         | Col_0_TU3            | TU3            | Gammaproteobacteria;Stenotrophomonas; OTU_874 |
| OTU_94   | 3.609115262  | Alphaproteobacteria | Sphingomonadaceae   | Sphingopyxis      | NA                                   | Col_0_cyp79B3        | cyp79B3        | Alphaproteobacteria;Sphingopyxis;OTU_94       |
| OTU_94   | 4.742379887  | Alphaproteobacteria | Sphingomonadaceae   | Sphingopyxis      | NA                                   | Col_0_cyp79B2cyp79B3 | cyp79B2cyp79B3 | Alphaproteobacteria;Sphingopyxis;OTU_94       |
| OTU_97   | -2.29673468  | Actinobacteria      | Nocardioidaceae     | Nocardioides      | uncultured bacterium                 | Col_0_cyp79B3        | cyp79B3        | Actinobacteria;Nocardioides;OTU_97            |
| OTU_97   | -2.459144791 | Actinobacteria      | Nocardioidaceae     | Nocardioides      | uncultured bacterium                 | Col_0_TU3            | TU3            | Actinobacteria;Nocardioides;OTU_97            |
| OTU_97   | -1.558001195 | Actinobacteria      | Nocardioidaceae     | Nocardioides      | uncultured bacterium                 | Col_0_Pen3_1NahG     | Pen3_1NahG     | Actinobacteria;Nocardioides;OTU_97            |

**Table S8: Differentially abundant root bacterial OTUs of Col\_0 and Ler\_0 and FLV mutants as determined using DESeq2.**

| otu      | FoldChange  | Class                       | Family              | Genus              | Species                 | WT_Mutant    | Mutant | Taxonomy_OTU                                     |
|----------|-------------|-----------------------------|---------------------|--------------------|-------------------------|--------------|--------|--------------------------------------------------|
| OTU_38   | -2.97858663 | Verrucomicrobiae            | Chthoniobacteraceae | Cand. Udaeobacter  | NA                      | Ler_0_tt7_7  | tt7_7  | Verrucomicrobiae;Cand. Udaeobacter;OTU_38        |
| OTU_3    | 1.743267866 | Actinobacteria              | Micrococcaceae      | Pseudarthrobacter  | NA                      | Ler_0_tt7_7  | tt7_7  | Actinobacteria;Pseudarthrobacter;OTU_3           |
| OTU_126  | -3.14119781 | Blastocatellia (Subgroup 4) | Blastocatellaceae   | JGI 0001001-H03    | NA                      | Ler_0_tt7_7  | tt7_7  | Blastocatellia (Subgrp4);JGI 0001001-H03;OTU_126 |
| OTU_667  | -6.93478856 | Bacteroidia                 | Flavobacteriaceae   | Flavobacterium     | NA                      | Ler_0_tt7_7  | tt7_7  | Bacteroidia;Flavobacterium;OTU_667               |
| OTU_43   | 1.962719485 | Gammaproteobacteria         | Burkholderiaceae    | Massilia           | uncultured Telluria sp. | Ler_0_tt7_7  | tt7_7  | Gammaproteobacteria;Massilia;OTU_43              |
| OTU_117  | -7.61194832 | Gammaproteobacteria         | Rhodanobacteraceae  | Rhodanobacter      | Ambiguous_taxa          | Ler_0_tt7_7  | tt7_7  | Gammaproteobacteria;Rhodanobacter;OTU_117        |
| OTU_6671 | -7.28576301 | Bacteroidia                 | Flavobacteriaceae   | Flavobacterium     | NA                      | Ler_0_tt5    | tt5    | Bacteroidia;Flavobacterium;OTU_6671              |
| OTU_7238 | -4.98047905 | Verrucomicrobiae            | Verrucomicrobiaceae | Prosthecobacter    | uncultured bacterium    | Col_0_pap1_D | pap1_D | Verrucomicrobiae;Prosthecobacter;OTU_7238        |
| OTU_28   | -2.07020319 | Actinobacteria              | Intrasporangiaceae  | Terrabacter        | Ambiguous_taxa          | Col_0_pap1_D | pap1_D | Actinobacteria;Terrabacter;OTU_28                |
| OTU_103  | -4.73322446 | Bacteroidia                 | Crocinitomicaceae   | Fluviicola         | NA                      | Col_0_pap1_D | pap1_D | Bacteroidia;Fluviicola;OTU_103                   |
| OTU_6672 | -5.35514599 | Bacteroidia                 | Flavobacteriaceae   | Flavobacterium     | NA                      | Col_0_pap1_D | pap1_D | Bacteroidia;Flavobacterium;OTU_6672              |
| OTU_519  | -4.32498315 | Gammaproteobacteria         | Burkholderiaceae    | Noviherbaspirillum | uncultured bacterium    | Col_0_pap1_D | pap1_D | Gammaproteobacteria;Noviherbaspirillum;OTU_519   |
| OTU_318  | -2.82480782 | Gammaproteobacteria         | Burkholderiaceae    | Massilia           | uncultured bacterium    | Col_0_pap1_D | pap1_D | Gammaproteobacteria;Massilia;OTU_318             |
| OTU_54   | -8.6981714  | Alphaproteobacteria         | Azospirillaceae     | Azospirillum       | NA                      | Col_0_pap1_D | pap1_D | Alphaproteobacteria;Azospirillum;OTU_54          |

**Table S9: Differentially abundant root bacterial OTUs of Col\_0 and Ler\_0 and DSMs mutants as determined using DESeq2.**

| otu      | FoldChange   | Class               | Family             | Genus                   | Species              | WT_Mutant          | Mutant       | Taxonomy_OTU                                     |
|----------|--------------|---------------------|--------------------|-------------------------|----------------------|--------------------|--------------|--------------------------------------------------|
| OTU_103  | -3.476457382 | Bacteroidia         | Crocinitomicaceae  | Fluviicola              | NA                   | Col_0_dde2         | dde2         | Bacteroidia;Fluviicola;OTU_103                   |
| OTU_103  | -5.581118515 | Bacteroidia         | Crocinitomicaceae  | Fluviicola              | NA                   | Col_0_etr1_3       | etr1_3       | Bacteroidia;Fluviicola;OTU_103                   |
| OTU_103  | -5.150983934 | Bacteroidia         | Crocinitomicaceae  | Fluviicola              | NA                   | Col_0_355_ERF      | 355_ERF      | Bacteroidia;Fluviicola;OTU_103                   |
| OTU_109  | 6.001387306  | Oxyphotobacteria    | Leptolyngbyaceae   | Leptolyngbya Es-Yyy1000 | uncultured bacterium | Col_0_dde2         | dde2         | Oxyphotobacteria;Leptolyngbya Es-Yyy1000;OTU_109 |
| OTU_117  | 2.471001666  | Gammaproteobacteria | Rhodanobacteraceae | Rhodanobacter           | Ambiguous_taxa       | Col_0_dde2         | dde2         | Gammaproteobacteria;Rhodanobacter;OTU_117        |
| OTU_119  | -1.680414929 | Actinobacteria      | Mycobacteriaceae   | Mycobacterium           | NA                   | Col_0_etr1_3       | etr1_3       | Actinobacteria;Mycobacterium;OTU_119             |
| OTU_13   | -1.648999374 | Actinobacteria      | Nocardioidaceae    | Nocardioides            | Ambiguous_taxa       | Col_0_etr1_3       | etr1_3       | Actinobacteria;Nocardioides;OTU_13               |
| OTU_1325 | -2.515268687 | Actinobacteria      | Nocardioidaceae    | Nocardioides            | uncultured bacterium | Col_0_fad7_1fad8_1 | fad7_1fad8_1 | Actinobacteria;Nocardioides;OTU_1325             |
| OTU_136  | 10.18444255  | Gammaproteobacteria | Cellvibrionaceae   | Cellvibrio              | uncultured bacterium | Col_0_dde2         | dde2         | Gammaproteobacteria;Cellvibrio;OTU_136           |

|          |              |                     |                     |                          |                      |                    |                     |                                                   |
|----------|--------------|---------------------|---------------------|--------------------------|----------------------|--------------------|---------------------|---------------------------------------------------|
| OTU_136  | 6.54864941   | Gammaproteobacteria | Cellvibrionaceae    | Cellvibrio               | uncultured bacterium | Col_0_fad7_1fad8_1 | <i>fad7_1fad8_1</i> | Gammaproteobacteria;Cellvibrio;OTU_136            |
| OTU_140  | -1.170258694 | Thermoleophilia     | uncultured          | NA                       | NA                   | Col_0_fad7_1fad8_1 | <i>fad7_1fad8_1</i> | Thermoleophilia;NA;OTU_140                        |
| OTU_142  | 4.251773128  | Oxyphotobacteria    | Nostocaceae         | Cylindrospermum PCC-7417 | NA                   | Col_0_dde2         | <i>dde2</i>         | Oxyphotobacteria;Cylindrospermum PCC-7417;OTU_142 |
| OTU_149  | -2.071439831 | Actinobacteria      | Frankiaceae         | Jatrophihabitans         | Ambiguous_taxa       | Col_0_etr1_3       | <i>etr1_3</i>       | Actinobacteria;Jatrophihabitans;OTU_149           |
| OTU_16   | -1.742746923 | Actinobacteria      | Streptomycetaceae   | Streptomyces             | NA                   | Col_0_etr1_3       | <i>etr1_3</i>       | Actinobacteria;Streptomyces;OTU_16                |
| OTU_166  | 1.582562117  | Gammaproteobacteria | SC-I-84             | NA                       | uncultured bacterium | Col_0_fad7_1fad8_1 | <i>fad7_1fad8_1</i> | Gammaproteobacteria;NA;OTU_166                    |
| OTU_17   | 3.137022059  | Alphaproteobacteria | Rhizobiaceae        | ANP-Rhizobium            | NA                   | Col_0_dde2         | <i>dde2</i>         | Alphaproteobacteria;ANP-Rhizobium;OTU_17          |
| OTU_17   | 1.380216626  | Alphaproteobacteria | Rhizobiaceae        | ANP-Rhizobium            | NA                   | Col_0_fad7_1fad8_1 | <i>fad7_1fad8_1</i> | Alphaproteobacteria;ANP-Rhizobium;OTU_17          |
| OTU_173  | 2.882582102  | Alphaproteobacteria | Caulobacteraceae    | Phenylobacterium         | Ambiguous_taxa       | Col_0_dde2         | <i>dde2</i>         | Alphaproteobacteria;Phenylobacterium;OTU_173      |
| OTU_1779 | 4.504999603  | Planctomycetacia    | Gemmataceae         | Gemmata                  | uncultured bacterium | Col_0_etr1_3       | <i>etr1_3</i>       | Planctomycetacia;Gemmata;OTU_1779                 |
| OTU_178  | -1.970998019 | Actinobacteria      | Sporichthyaceae     | NA                       | uncultured bacterium | Col_0_etr1_3       | <i>etr1_3</i>       | Actinobacteria;NA;OTU_178                         |
| OTU_178  | -1.509206617 | Actinobacteria      | Sporichthyaceae     | NA                       | uncultured bacterium | Col_0_fad7_1fad8_1 | <i>fad7_1fad8_1</i> | Actinobacteria;NA;OTU_178                         |
| OTU_190  | -2.56966577  | Verrucomicrobiae    | Chthoniobacteraceae | Cand. Udaeobacter        | NA                   | Ler_0_aba3_2       | <i>aba3_2</i>       | Verrucomicrobiae;Cand. Udaeobacter;OTU_190        |
| OTU_20   | -1.492533387 | Verrucomicrobiae    | Chthoniobacteraceae | Cand. Udaeobacter        | Ambiguous_taxa       | Ler_0_aba3_2       | <i>aba3_2</i>       | Verrucomicrobiae;Cand. Udaeobacter;OTU_20         |
| OTU_201  | 10.49881922  | Bacteroidia         | Crocinitomicaceae   | Fluviicola               | uncultured bacterium | Col_0_dde2         | <i>dde2</i>         | Bacteroidia;Fluviicola;OTU_201                    |
| OTU_201  | 8.476016863  | Bacteroidia         | Crocinitomicaceae   | Fluviicola               | uncultured bacterium | Col_0_fad7_1fad8_1 | <i>fad7_1fad8_1</i> | Bacteroidia;Fluviicola;OTU_201                    |
| OTU_202  | 1.446767094  | Verrucomicrobiae    | Chthoniobacteraceae | Cand. Udaeobacter        | Ambiguous_taxa       | Col_0_etr1_3       | <i>etr1_3</i>       | Verrucomicrobiae;Cand. Udaeobacter;OTU_202        |
| OTU_21   | 1.454990613  | Alphaproteobacteria | Methyloligellaceae  | NA                       | Ambiguous_taxa       | Col_0_fad7_1fad8_1 | <i>fad7_1fad8_1</i> | Alphaproteobacteria;NA;OTU_21                     |
| OTU_228  | 7.57543183   | Bacteroidia         | Sphingobacteriaceae | Pedobacter               | NA                   | Col_0_dde2         | <i>dde2</i>         | Bacteroidia;Pedobacter;OTU_228                    |
| OTU_28   | -1.535524249 | Actinobacteria      | Intrasporangiaceae  | Terrabacter              | Ambiguous_taxa       | Col_0_etr1_3       | <i>etr1_3</i>       | Actinobacteria;Terrabacter;OTU_28                 |
| OTU_281  | 6.117288618  | Alphaproteobacteria | Beijerinckiaceae    | Bosea                    | NA                   | Col_0_dde2         | <i>dde2</i>         | Alphaproteobacteria;Bosea;OTU_281                 |
| OTU_3    | 1.425081056  | Actinobacteria      | Micrococcaceae      | Pseudarthrobacter        | NA                   | Ler_0_aba3_2       | <i>aba3_2</i>       | Actinobacteria;Pseudarthrobacter;OTU_3            |
| OTU_3    | 0.832307889  | Actinobacteria      | Micrococcaceae      | Pseudarthrobacter        | NA                   | Col_0_fad7_1fad8_1 | <i>fad7_1fad8_1</i> | Actinobacteria;Pseudarthrobacter;OTU_3            |
| OTU_318  | -2.848801354 | Gammaproteobacteria | Burkholderiaceae    | Massilia                 | uncultured bacterium | Col_0_fad7_1fad8_1 | <i>fad7_1fad8_1</i> | Gammaproteobacteria;Massilia;OTU_318              |
| OTU_331  | 4.755934045  | Gammaproteobacteria | Pseudomonadaceae    | Pseudomonas              | Ambiguous_taxa       | Col_0_dde2         | <i>dde2</i>         | Gammaproteobacteria;Pseudomonas;OTU_331           |
| OTU_331  | 3.424214913  | Gammaproteobacteria | Pseudomonadaceae    | Pseudomonas              | Ambiguous_taxa       | Col_0_etr1_3       | <i>etr1_3</i>       | Gammaproteobacteria;Pseudomonas;OTU_331           |
| OTU_331  | 2.496552952  | Gammaproteobacteria | Pseudomonadaceae    | Pseudomonas              | Ambiguous_taxa       | Col_0_355_ERF      | <i>355_ERF</i>      | Gammaproteobacteria;Pseudomonas;OTU_331           |
| OTU_339  | 1.889641254  | Planctomycetacia    | uncultured          | Ambiguous_taxa           | Ambiguous_taxa       | Col_0_etr1_3       | <i>etr1_3</i>       | Planctomycetacia;Ambiguous_taxa;OTU_339           |
| OTU_341  | 2.45105702   | Planctomycetacia    | Pirellulaceae       | Pirellula                | uncultured bacterium | Col_0_etr1_3       | <i>etr1_3</i>       | Planctomycetacia;Pirellula;OTU_341                |
| OTU_3486 | -1.481275263 | Actinobacteria      | Intrasporangiaceae  | Lapillicoccus            | NA                   | Col_0_etr1_3       | <i>etr1_3</i>       | Actinobacteria;Lapillicoccus;OTU_3486             |
| OTU_3486 | -1.867128487 | Actinobacteria      | Intrasporangiaceae  | Lapillicoccus            | NA                   | Col_0_355_ERF      | <i>355_ERF</i>      | Actinobacteria;Lapillicoccus;OTU_3486             |



|          |              |                     |                     |                    |                         |                    |              |                                                |
|----------|--------------|---------------------|---------------------|--------------------|-------------------------|--------------------|--------------|------------------------------------------------|
| OTU_3620 | 2.640336749  | Verrucomicrobiae    | Chthoniobacteraceae | Cand. Udaeobacter  | NA                      | Col_0_etr1_3       | etr1_3       | Verrucomicrobiae;Cand. Udaeobacter;OTU_3620    |
| OTU_38   | -1.921534299 | Verrucomicrobiae    | Chthoniobacteraceae | Cand. Udaeobacter  | NA                      | Ler_0_aba3_2       | aba3_2       | Verrucomicrobiae;Cand. Udaeobacter;OTU_38      |
| OTU_39   | -2.345233006 | Verrucomicrobiae    | Chthoniobacteraceae | Cand. Udaeobacter  | uncultured bacterium    | Ler_0_aba3_2       | aba3_2       | Verrucomicrobiae;Cand. Udaeobacter;OTU_39      |
| OTU_393  | -5.025361933 | Chloroflexia        | JG30-KF-CM45        | NA                 | uncultured bacterium    | Col_0_etr1_3       | etr1_3       | Chloroflexia;NA;OTU_393                        |
| OTU_40   | 5.016834157  | Alphaproteobacteria | Caulobacteraceae    | Brevundimonas      | Ambiguous_taxa          | Col_0_dde2         | dde2         | Alphaproteobacteria;Brevundimonas;OTU_40       |
| OTU_404  | 1.877875346  | Gammaproteobacteria | Unknown Family      | Acidibacter        | NA                      | Col_0_35S_ERF      | 35S_ERF      | Gammaproteobacteria;Acidibacter;OTU_404        |
| OTU_405  | -1.642863245 | Thermoleophilia     | 67-14               | NA                 | uncultured bacterium    | Col_0_etr1_3       | etr1_3       | Thermoleophilia;NA;OTU_405                     |
| OTU_405  | -1.342449962 | Thermoleophilia     | 67-14               | NA                 | uncultured bacterium    | Col_0_fad7_1fad8_1 | fad7_1fad8_1 | Thermoleophilia;NA;OTU_405                     |
| OTU_43   | 2.133889257  | Gammaproteobacteria | Burkholderiaceae    | Massilia           | uncultured Telluria sp. | Col_0_dde2         | dde2         | Gammaproteobacteria;Massilia;OTU_43            |
| OTU_44   | -1.973149687 | Thermoleophilia     | Gaiellaceae         | Gaiella            | NA                      | Col_0_etr1_3       | etr1_3       | Thermoleophilia;Gaiella;OTU_44                 |
| OTU_5    | 0.784100883  | Alphaproteobacteria | Sphingomonadaceae   | Sphingomonas       | uncultured bacterium    | Col_0_fad7_1fad8_1 | fad7_1fad8_1 | Alphaproteobacteria;Sphingomonas;OTU_5         |
| OTU_517  | -7.586986764 | Gammaproteobacteria | Burkholderiaceae    | Hermiimonas        | uncultured bacterium    | Col_0_dde2         | dde2         | Gammaproteobacteria;Hermiimonas;OTU_517        |
| OTU_517  | -7.587464301 | Gammaproteobacteria | Burkholderiaceae    | Hermiimonas        | uncultured bacterium    | Col_0_etr1_3       | etr1_3       | Gammaproteobacteria;Hermiimonas;OTU_517        |
| OTU_517  | -5.615771579 | Gammaproteobacteria | Burkholderiaceae    | Hermiimonas        | uncultured bacterium    | Col_0_35S_ERF      | 35S_ERF      | Gammaproteobacteria;Hermiimonas;OTU_517        |
| OTU_519  | -6.648444506 | Gammaproteobacteria | Burkholderiaceae    | Noviherbaspirillum | uncultured bacterium    | Ler_0_aba3_2       | aba3_2       | Gammaproteobacteria;Noviherbaspirillum;OTU_519 |
| OTU_519  | -3.199648685 | Gammaproteobacteria | Burkholderiaceae    | Noviherbaspirillum | uncultured bacterium    | Col_0_fad7_1fad8_1 | fad7_1fad8_1 | Gammaproteobacteria;Noviherbaspirillum;OTU_519 |
| OTU_533  | -1.565100179 | Thermoleophilia     | 67-14               | NA                 | uncultured bacterium    | Col_0_fad7_1fad8_1 | fad7_1fad8_1 | Thermoleophilia;NA;OTU_533                     |
| OTU_54   | -6.893268926 | Alphaproteobacteria | Azospirillaceae     | Azospirillum       | NA                      | Col_0_dde2         | dde2         | Alphaproteobacteria;Azospirillum;OTU_54        |
| OTU_54   | -8.531780225 | Alphaproteobacteria | Azospirillaceae     | Azospirillum       | NA                      | Col_0_etr1_3       | etr1_3       | Alphaproteobacteria;Azospirillum;OTU_54        |
| OTU_54   | -8.451564064 | Alphaproteobacteria | Azospirillaceae     | Azospirillum       | NA                      | Col_0_35S_ERF      | 35S_ERF      | Alphaproteobacteria;Azospirillum;OTU_54        |
| OTU_54   | -9.380030979 | Alphaproteobacteria | Azospirillaceae     | Azospirillum       | NA                      | Col_0_fad7_1fad8_1 | fad7_1fad8_1 | Alphaproteobacteria;Azospirillum;OTU_54        |
| OTU_56   | -2.034446047 | Actinobacteria      | Nocardioidaceae     | Nocardioides       | Ambiguous_taxa          | Col_0_etr1_3       | etr1_3       | Actinobacteria;Nocardioides;OTU_56             |
| OTU_56   | -1.482947842 | Actinobacteria      | Nocardioidaceae     | Nocardioides       | Ambiguous_taxa          | Col_0_fad7_1fad8_1 | fad7_1fad8_1 | Actinobacteria;Nocardioides;OTU_56             |
| OTU_5687 | 5.680788198  | Verrucomicrobiae    | Pedospaeraceae      | NA                 | uncultured bacterium    | Col_0_dde2         | dde2         | Verrucomicrobiae;NA;OTU_5687                   |
| OTU_57   | -1.241111919 | Bacilli             | Paenibacillaceae    | Paenibacillus      | uncultured bacterium    | Col_0_fad7_1fad8_1 | fad7_1fad8_1 | Bacilli;Paenibacillus;OTU_57                   |
| OTU_58   | -1.050292513 | Thermoleophilia     | 67-14               | NA                 | uncultured bacterium    | Col_0_fad7_1fad8_1 | fad7_1fad8_1 | Thermoleophilia;NA;OTU_58                      |
| OTU_597  | 6.362220292  | Alphaproteobacteria | Rhizobiaceae        | ANP-Rhizobium      | NA                      | Col_0_fad7_1fad8_1 | fad7_1fad8_1 | Alphaproteobacteria;ANP-Rhizobium;OTU_597      |
| OTU_60   | 1.170450311  | Alphaproteobacteria | Devosiaceae         | Devosia            | uncultured bacterium    | Col_0_fad7_1fad8_1 | fad7_1fad8_1 | Alphaproteobacteria;Devosia;OTU_60             |
| OTU_6428 | 7.765034808  | Gammaproteobacteria | Burkholderiaceae    | Variovorax         | NA                      | Col_0_dde2         | dde2         | Gammaproteobacteria;Variovorax;OTU_6428        |
| OTU_6428 | 6.217374226  | Gammaproteobacteria | Burkholderiaceae    | Variovorax         | NA                      | Col_0_etr1_3       | etr1_3       | Gammaproteobacteria;Variovorax;OTU_6428        |
| OTU_643  | 2.126918974  | Bacilli             | Paenibacillaceae    | Paenibacillus      | NA                      | Col_0_dde2         | dde2         | Bacilli;Paenibacillus;OTU_643                  |

|          |              |                     |                      |                   |                                              |                    |              |                                              |
|----------|--------------|---------------------|----------------------|-------------------|----------------------------------------------|--------------------|--------------|----------------------------------------------|
| OTU_667  | -4.415235276 | Bacteroidia         | Flavobacteriaceae    | Flavobacterium    | NA                                           | Ler_0_aba3_2       | aba3_2       | Bacteroidia;Flavobacterium;OTU_667           |
| OTU_667  | -5.392259739 | Bacteroidia         | Flavobacteriaceae    | Flavobacterium    | NA                                           | Col_0_etr1_3       | etr1_3       | Bacteroidia;Flavobacterium;OTU_667           |
| OTU_667  | -5.041585444 | Bacteroidia         | Flavobacteriaceae    | Flavobacterium    | NA                                           | Col_0_355_ERF      | 355_ERF      | Bacteroidia;Flavobacterium;OTU_667           |
| OTU_667  | -5.465240875 | Bacteroidia         | Flavobacteriaceae    | Flavobacterium    | NA                                           | Col_0_fad7_1fad8_1 | fad7_1fad8_1 | Bacteroidia;Flavobacterium;OTU_667           |
| OTU_68   | -1.577464819 | Thermoleophilia     | uncultured           | NA                | uncultured bacterium                         | Col_0_etr1_3       | etr1_3       | Thermoleophilia;NA;OTU_68                    |
| OTU_7    | 0.888027473  | Alphaproteobacteria | Xanthobacteraceae    | Bradyrhizobium    | Ambiguous_taxa                               | Ler_0_aba3_2       | aba3_2       | Alphaproteobacteria;Bradyrhizobium;OTU_7     |
| OTU_70   | -1.514711719 | Actinobacteria      | Nocardioideae        | Nocardioides      | uncultured bacterium                         | Col_0_etr1_3       | etr1_3       | Actinobacteria;Nocardioides;OTU_70           |
| OTU_70   | -1.479596224 | Actinobacteria      | Nocardioideae        | Nocardioides      | uncultured bacterium                         | Col_0_fad7_1fad8_1 | fad7_1fad8_1 | Actinobacteria;Nocardioides;OTU_70           |
| OTU_71   | 0.599226748  | Alphaproteobacteria | Xanthobacteraceae    | Bradyrhizobium    | Ambiguous_taxa                               | Col_0_fad7_1fad8_1 | fad7_1fad8_1 | Alphaproteobacteria;Bradyrhizobium;OTU_71    |
| OTU_72   | -1.972888422 | Actinobacteria      | Geodermatophilaceae  | Blastococcus      | uncultured bacterium                         | Col_0_etr1_3       | etr1_3       | Actinobacteria;Blastococcus;OTU_72           |
| OTU_7238 | -5.025754328 | Verrucomicrobiae    | Verrucomicrobiaceae  | Prosthecoacter    | uncultured bacterium                         | Col_0_etr1_3       | etr1_3       | Verrucomicrobiae;Prosthecoacter;OTU_7238     |
| OTU_7238 | -5.758505712 | Verrucomicrobiae    | Verrucomicrobiaceae  | Prosthecoacter    | uncultured bacterium                         | Col_0_fad7_1fad8_1 | fad7_1fad8_1 | Verrucomicrobiae;Prosthecoacter;OTU_7238     |
| OTU_774  | 6.385025227  | Bacteroidia         | Weeksellaceae        | Chryseobacterium  | Ambiguous_taxa                               | Col_0_dde2         | dde2         | Bacteroidia;Chryseobacterium;OTU_774         |
| OTU_79   | 1.914027918  | Verrucomicrobiae    | Chthoniobacteraceae  | Cand. Udaeobacter | NA                                           | Col_0_etr1_3       | etr1_3       | Verrucomicrobiae;Cand. Udaeobacter;OTU_79    |
| OTU_806  | -1.67116143  | Thermoleophilia     | Solirubrobacteraceae | Solirubrobacter   | uncultured bacterium                         | Col_0_fad7_1fad8_1 | fad7_1fad8_1 | Thermoleophilia;Solirubrobacter;OTU_806      |
| OTU_809  | 4.427161151  | Verrucomicrobiae    | Chthoniobacteraceae  | Chthoniobacter    | NA                                           | Col_0_dde2         | dde2         | Verrucomicrobiae;Chthoniobacter;OTU_809      |
| OTU_81   | 2.039259394  | Verrucomicrobiae    | Chthoniobacteraceae  | Cand. Udaeobacter | uncultured Verrucomicrobia bacterium         | Col_0_etr1_3       | etr1_3       | Verrucomicrobiae;Cand. Udaeobacter;OTU_81    |
| OTU_82   | -1.627744635 | Actinobacteria      | Nocardioideae        | Marmoricola       | Ambiguous_taxa                               | Col_0_fad7_1fad8_1 | fad7_1fad8_1 | Actinobacteria;Marmoricola;OTU_82            |
| OTU_854  | 3.512076714  | Planctomycetacia    | Gemmataceae          | NA                | uncultured bacterium                         | Col_0_etr1_3       | etr1_3       | Planctomycetacia;NA;OTU_854                  |
| OTU_874  | -5.272260217 | Gammaproteobacteria | Xanthomonadaceae     | Stenotrophomonas  | Stenotrophomonas maltophilia                 | Col_0_fad7_1fad8_1 | fad7_1fad8_1 | Gammaproteobacteria;Stenotrophomonas;OTU_874 |
| OTU_878  | 5.54480128   | Gammaproteobacteria | Burkholderiaceae     | Variovorax        | Ambiguous_taxa                               | Col_0_dde2         | dde2         | Gammaproteobacteria;Variovorax;OTU_878       |
| OTU_94   | 5.102082543  | Alphaproteobacteria | Sphingomonadaceae    | Sphingopyxis      | NA                                           | Col_0_dde2         | dde2         | Alphaproteobacteria;Sphingopyxis;OTU_94      |
| OTU_97   | -2.54648125  | Actinobacteria      | Nocardioideae        | Nocardioides      | uncultured bacterium                         | Col_0_etr1_3       | etr1_3       | Actinobacteria;Nocardioides;OTU_97           |
| OTU_97   | -1.406715336 | Actinobacteria      | Nocardioideae        | Nocardioides      | uncultured bacterium                         | Col_0_fad7_1fad8_1 | fad7_1fad8_1 | Actinobacteria;Nocardioides;OTU_97           |
| OTU_9861 | -1.712685781 | Verrucomicrobiae    | Chthoniobacteraceae  | Cand. Udaeobacter | uncultured Xiphinematobacteriaceae bacterium | Ler_0_aba3_2       | aba3_2       | Verrucomicrobiae;Cand. Udaeobacter;OTU_9861  |
| OTU_9861 | 1.558866768  | Verrucomicrobiae    | Chthoniobacteraceae  | Cand. Udaeobacter | uncultured Xiphinematobacteriaceae bacterium | Col_0_etr1_3       | etr1_3       | Verrucomicrobiae;Cand. Udaeobacter;OTU_9861  |

**Table S10: Differentially abundant root fungal OTUs of Col\_0 and GLS mutants as determined using DESeq2.**

| otu     | FoldChange   | Phylum        | Class           | Family                            | Genus             | Species                       | WT_Mutant            | Mutant                | Taxonomy_OTU                             |
|---------|--------------|---------------|-----------------|-----------------------------------|-------------------|-------------------------------|----------------------|-----------------------|------------------------------------------|
| OTU_100 | -7.224048037 | Ascomycota    | Dothideomycetes | unidentified                      | NA                | unidentified                  | Col_0_cyp79B2cyp79B3 | <i>cyp79B2cyp79B3</i> | Dothideomycetes;NA;OTU_100               |
| OTU_100 | -6.020535038 | Ascomycota    | Dothideomycetes | unidentified                      | NA                | unidentified                  | Col_0_myb51          | <i>myb51</i>          | Dothideomycetes;NA;OTU_100               |
| OTU_100 | -6.602500464 | Ascomycota    | Dothideomycetes | unidentified                      | NA                | unidentified                  | Col_0_gsm1_1         | <i>gsm1_1</i>         | Dothideomycetes;NA;OTU_100               |
| OTU_100 | -7.159314897 | Ascomycota    | Dothideomycetes | unidentified                      | NA                | unidentified                  | Col_0_TU3            | <i>TU3</i>            | Dothideomycetes;NA;OTU_100               |
| OTU_101 | 8.104628594  | Basidiomycota | Tremellomycetes | Trichosporonaceae                 | Apiotrichum       | NA                            | Col_0_Pen3_1NahG     | <i>Pen3_1NahG</i>     | Tremellomycetes;Apiotrichum;OTU_101      |
| OTU_111 | -6.362379572 | Ascomycota    | Sordariomycetes | Nectriaceae                       | Fusarium          | NA                            | Col_0_Pen3_1NahG     | <i>Pen3_1NahG</i>     | Sordariomycetes;Fusarium;OTU_111         |
| OTU_120 | 8.50745825   | Ascomycota    | Leotiomycetes   | unidentified                      | NA                | unidentified                  | Col_0_Pen3_1NahG     | <i>Pen3_1NahG</i>     | Leotiomycetes;NA;OTU_120                 |
| OTU_125 | 27.00414729  | Basidiomycota | Agaricomycetes  | Entolomataceae                    | Clitopilus        | unidentified                  | Col_0_Pen3_1NahG     | <i>Pen3_1NahG</i>     | Agaricomycetes;Clitopilus;OTU_125        |
| OTU_136 | 6.32554767   | Ascomycota    | Leotiomycetes   | Leotiaceae                        | Neobulgaria       | NA                            | Col_0_Pen3_1NahG     | <i>Pen3_1NahG</i>     | Leotiomycetes;Neobulgaria;OTU_136        |
| OTU_139 | 8.021176705  | Ascomycota    | Eurotiomycetes  | unidentified                      | NA                | unidentified                  | Col_0_gsm1_1         | <i>gsm1_1</i>         | Eurotiomycetes;NA;OTU_139                |
| OTU_139 | 5.641735042  | Ascomycota    | Eurotiomycetes  | unidentified                      | NA                | unidentified                  | Col_0_Pen3_1NahG     | <i>Pen3_1NahG</i>     | Eurotiomycetes;NA;OTU_139                |
| OTU_16  | -2.723717198 | Ascomycota    | Dothideomycetes | Didymosphaeriaceae                | Paraphaeosphaeria | NA                            | Col_0_TU3            | <i>TU3</i>            | Dothideomycetes;Paraphaeosphaeria;OTU_16 |
| OTU_171 | 10.70600693  | Basidiomycota | Agaricomycetes  | Cantharellales_fam_Incertae_sedis | Sistotrema        | NA                            | Col_0_Pen3_1NahG     | <i>Pen3_1NahG</i>     | Agaricomycetes;Sistotrema;OTU_171        |
| OTU_18  | 2.503726554  | Ascomycota    | Sordariomycetes | Bionectriaceae                    | Clonostachys      | <i>Clonostachys_rosea</i>     | Col_0_TU3            | <i>TU3</i>            | Sordariomycetes;Clonostachys;OTU_18      |
| OTU_182 | -6.426614176 | Ascomycota    | Sordariomycetes | unidentified                      | NA                | unidentified                  | Col_0_TU3            | <i>TU3</i>            | Sordariomycetes;NA;OTU_182               |
| OTU_186 | 9.778297109  | Ascomycota    | Eurotiomycetes  | Herpotrichiellaceae               | Exophiala         | NA                            | Col_0_gsm1_1         | <i>gsm1_1</i>         | Eurotiomycetes;Exophiala;OTU_186         |
| OTU_186 | 7.460760485  | Ascomycota    | Eurotiomycetes  | Herpotrichiellaceae               | Exophiala         | NA                            | Col_0_TU3            | <i>TU3</i>            | Eurotiomycetes;Exophiala;OTU_186         |
| OTU_193 | 7.965431551  | Ascomycota    | Leotiomycetes   | unidentified                      | NA                | unidentified                  | Col_0_cyp79B2cyp79B3 | <i>cyp79B2cyp79B3</i> | Leotiomycetes;NA;OTU_193                 |
| OTU_193 | 8.174227241  | Ascomycota    | Leotiomycetes   | unidentified                      | NA                | unidentified                  | Col_0_Pen3_1NahG     | <i>Pen3_1NahG</i>     | Leotiomycetes;NA;OTU_193                 |
| OTU_194 | 7.352115175  | Ascomycota    | Leotiomycetes   | unidentified                      | NA                | unidentified                  | Col_0_TU3            | <i>TU3</i>            | Leotiomycetes;NA;OTU_194                 |
| OTU_244 | 7.793107687  | Ascomycota    | Eurotiomycetes  | Herpotrichiellaceae               | Exophiala         | NA                            | Col_0_myb51          | <i>myb51</i>          | Eurotiomycetes;Exophiala;OTU_244         |
| OTU_244 | 8.280453242  | Ascomycota    | Eurotiomycetes  | Herpotrichiellaceae               | Exophiala         | NA                            | Col_0_gsm1_1         | <i>gsm1_1</i>         | Eurotiomycetes;Exophiala;OTU_244         |
| OTU_25  | 3.092406808  | Ascomycota    | Sordariomycetes | Nectriaceae                       | Fusarium          | NA                            | Col_0_myb51          | <i>myb51</i>          | Sordariomycetes;Fusarium;OTU_25          |
| OTU_25  | 3.521089858  | Ascomycota    | Sordariomycetes | Nectriaceae                       | Fusarium          | NA                            | Col_0_TU3            | <i>TU3</i>            | Sordariomycetes;Fusarium;OTU_25          |
| OTU_252 | 7.067751758  | Ascomycota    | Leotiomycetes   | Pseudeurotiaceae                  | NA                | NA                            | Col_0_TU3            | <i>TU3</i>            | Leotiomycetes;NA;OTU_252                 |
| OTU_26  | -6.856673713 | Basidiomycota | Tremellomycetes | Piskurozymaceae                   | Solicozozyma      | <i>Solicozozyma_terricola</i> | Col_0_cyp79B2cyp79B3 | <i>cyp79B2cyp79B3</i> | Tremellomycetes;Solicozozyma;OTU_26      |
| OTU_27  | -6.989841775 | Ascomycota    | Sordariomycetes | Magnaporthaceae                   | Falciphora        | NA                            | Col_0_cyp79B2cyp79B3 | <i>cyp79B2cyp79B3</i> | Sordariomycetes;Falciphora;OTU_27        |
| OTU_270 | -6.476351049 | Ascomycota    | Eurotiomycetes  | Herpotrichiellaceae               | NA                | unidentified                  | Col_0_cyp79B2cyp79B3 | <i>cyp79B2cyp79B3</i> | Eurotiomycetes;NA;OTU_270                |
| OTU_270 | -6.094106803 | Ascomycota    | Eurotiomycetes  | Herpotrichiellaceae               | NA                | unidentified                  | Col_0_myb51          | <i>myb51</i>          | Eurotiomycetes;NA;OTU_270                |

|         |              |               |                    |                                |                     |                            |                      |                |                                             |
|---------|--------------|---------------|--------------------|--------------------------------|---------------------|----------------------------|----------------------|----------------|---------------------------------------------|
| OTU_270 | -6.336274812 | Ascomycota    | Eurotiomycetes     | Herpotrichiellaceae            | NA                  | unidentified               | Col_0_TU3            | TU3            | Eurotiomycetes;NA;OTU_270                   |
| OTU_28  | 8.997176222  | Ascomycota    | Dothideomycetes    | unidentified                   | NA                  | unidentified               | Col_0_gsm1_1         | gsm1_1         | Dothideomycetes;NA;OTU_28                   |
| OTU_280 | 8.494216657  | Ascomycota    | Eurotiomycetes     | Herpotrichiellaceae            | Cladophialophora    | unidentified               | Col_0_cyp79B2cyp79B3 | cyp79B2cyp79B3 | Eurotiomycetes;Cladophialophora;OTU_280     |
| OTU_281 | 7.737235207  | Ascomycota    | Dothideomycetes    | unidentified                   | NA                  | unidentified               | Col_0_Pen3_1NahG     | Pen3_1NahG     | Dothideomycetes;NA;OTU_281                  |
| OTU_301 | 8.316215013  | Ascomycota    | Dothideomycetes    | NA                             | NA                  | NA                         | Col_0_gsm1_1         | gsm1_1         | Dothideomycetes;NA;OTU_301                  |
| OTU_311 | -22.79707674 | Basidiomycota | Microbotryomycetes | Sporidiobolaceae               | Sporobolomyces      | NA                         | Col_0_cyp79B2cyp79B3 | cyp79B2cyp79B3 | Microbotryomycetes;Sporobolomyces;OTU_311   |
| OTU_311 | -23.02518505 | Basidiomycota | Microbotryomycetes | Sporidiobolaceae               | Sporobolomyces      | NA                         | Col_0_myb51          | myb51          | Microbotryomycetes;Sporobolomyces;OTU_311   |
| OTU_311 | -22.55976342 | Basidiomycota | Microbotryomycetes | Sporidiobolaceae               | Sporobolomyces      | NA                         | Col_0_gsm1_1         | gsm1_1         | Microbotryomycetes;Sporobolomyces;OTU_311   |
| OTU_311 | -23.95758871 | Basidiomycota | Microbotryomycetes | Sporidiobolaceae               | Sporobolomyces      | NA                         | Col_0_TU3            | TU3            | Microbotryomycetes;Sporobolomyces;OTU_311   |
| OTU_311 | -25.65827059 | Basidiomycota | Microbotryomycetes | Sporidiobolaceae               | Sporobolomyces      | NA                         | Col_0_Pen3_1NahG     | Pen3_1NahG     | Microbotryomycetes;Sporobolomyces;OTU_311   |
| OTU_333 | 8.019538913  | Ascomycota    | Dothideomycetes    | unidentified                   | NA                  | unidentified               | Col_0_cyp79B2cyp79B3 | cyp79B2cyp79B3 | Dothideomycetes;NA;OTU_333                  |
| OTU_355 | 10.28022705  | Ascomycota    | Leotiomycetes      | Helotiaceae                    | Hymenoscyphus       | Hymenoscyphus_albidus      | Col_0_myb51          | myb51          | Leotiomycetes;Hymenoscyphus;OTU_355         |
| OTU_382 | 7.554816276  | Basidiomycota | Agaricomycetes     | Entolomataceae                 | Entoloma            | unidentified               | Col_0_Pen3_1NahG     | Pen3_1NahG     | Agaricomycetes;Entoloma;OTU_382             |
| OTU_4   | -11.7593003  | Ascomycota    | Sordariomycetes    | Hypocreales_fam_Incertae_sedis | Emericellopsis      | NA                         | Col_0_cyp79B2cyp79B3 | cyp79B2cyp79B3 | Sordariomycetes;Emericellopsis;OTU_4        |
| OTU_4   | -10.80017259 | Ascomycota    | Sordariomycetes    | Hypocreales_fam_Incertae_sedis | Emericellopsis      | NA                         | Col_0_myb51          | myb51          | Sordariomycetes;Emericellopsis;OTU_4        |
| OTU_411 | 7.008670357  | Ascomycota    | Sordariomycetes    | Coniochaetaceae                | NA                  | NA                         | Col_0_Pen3_1NahG     | Pen3_1NahG     | Sordariomycetes;NA;OTU_411                  |
| OTU_42  | -5.589118733 | Ascomycota    | Sordariomycetes    | Glomerellaceae                 | Colletotrichum      | NA                         | Col_0_gsm1_1         | gsm1_1         | Sordariomycetes;Colletotrichum;OTU_42       |
| OTU_43  | -10.53850192 | Ascomycota    | Sordariomycetes    | Hypocreales_fam_Incertae_sedis | Emericellopsis      | NA                         | Col_0_gsm1_1         | gsm1_1         | Sordariomycetes;Emericellopsis;OTU_43       |
| OTU_44  | -12.09450331 | Ascomycota    | Sordariomycetes    | Hypocreales_fam_Incertae_sedis | Emericellopsis      | NA                         | Col_0_TU3            | TU3            | Sordariomycetes;Emericellopsis;OTU_44       |
| OTU_482 | 7.959349957  | Basidiomycota | Agaricomycetes     | Psathyrellaceae                | Coprinellus         | NA                         | Col_0_gsm1_1         | gsm1_1         | Agaricomycetes;Coprinellus;OTU_482          |
| OTU_504 | 8.531258647  | Ascomycota    | Leotiomycetes      | Helotiales_fam_Incertae_sedis  | Cadophora           | NA                         | Col_0_Pen3_1NahG     | Pen3_1NahG     | Leotiomycetes;Cadophora;OTU_504             |
| OTU_53  | -8.073406249 | Ascomycota    | Pezizomycetes      | Pyronemataceae                 | NA                  | unidentified               | Col_0_cyp79B2cyp79B3 | cyp79B2cyp79B3 | Pezizomycetes;NA;OTU_53                     |
| OTU_53  | -7.87021594  | Ascomycota    | Pezizomycetes      | Pyronemataceae                 | NA                  | unidentified               | Col_0_myb51          | myb51          | Pezizomycetes;NA;OTU_53                     |
| OTU_53  | -7.558157186 | Ascomycota    | Pezizomycetes      | Pyronemataceae                 | NA                  | unidentified               | Col_0_gsm1_1         | gsm1_1         | Pezizomycetes;NA;OTU_53                     |
| OTU_54  | -4.864588699 | Ascomycota    | Sordariomycetes    | NA                             | NA                  | NA                         | Col_0_TU3            | TU3            | Sordariomycetes;NA;OTU_54                   |
| OTU_55  | 4.521480462  | Ascomycota    | Sordariomycetes    | Bionectriaceae                 | Clonostachys        | NA                         | Col_0_TU3            | TU3            | Sordariomycetes;Clonostachys;OTU_55         |
| OTU_56  | -7.702258662 | Basidiomycota | Tremellomycetes    | Tetragoniomycetaceae           | Tetragoniomyces     | Tetragoniomyces_uliginosus | Col_0_cyp79B2cyp79B3 | cyp79B2cyp79B3 | Tremellomycetes;Tetragoniomyces;OTU_56      |
| OTU_560 | 23.1456711   | Basidiomycota | Tremellomycetes    | Trichosporonaceae              | Cutaneotrichosporon | NA                         | Col_0_cyp79B2cyp79B3 | cyp79B2cyp79B3 | Tremellomycetes;Cutaneotrichosporon;OTU_560 |
| OTU_594 | 10.32802544  | Ascomycota    | Eurotiomycetes     | Herpotrichiellaceae            | Exophiala           | NA                         | Col_0_gsm1_1         | gsm1_1         | Eurotiomycetes;Exophiala;OTU_594            |
| OTU_71  | 7.381295707  | Ascomycota    | Leotiomycetes      | Helotiaceae                    | Hymenoscyphus       | NA                         | Col_0_TU3            | TU3            | Leotiomycetes;Hymenoscyphus;OTU_71          |

|        |              |            |                            |    |    |    |                      |                       |                                      |
|--------|--------------|------------|----------------------------|----|----|----|----------------------|-----------------------|--------------------------------------|
| OTU_79 | -6.746725952 | Ascomycota | Ascomycota (Unknown Class) | NA | NA | NA | Col_0_cyp79B2cyp79B3 | <i>cyp79B2cyp79B3</i> | Ascomycota (Unknown Class);NA;OTU_79 |
| OTU_79 | -6.140614984 | Ascomycota | Ascomycota (Unknown Class) | NA | NA | NA | Col_0_myb51          | <i>myb51</i>          | Ascomycota (Unknown Class);NA;OTU_79 |
| OTU_79 | -6.148299027 | Ascomycota | Ascomycota (Unknown Class) | NA | NA | NA | Col_0_gsm1_1         | <i>gsm1_1</i>         | Ascomycota (Unknown Class);NA;OTU_79 |

**Table S11: Differentially abundant root fungal OTUs of Col\_0 and Ler\_0 and FLV mutants as determined using DESeq2.**

| otu     | FoldChange   | Phylum            | Class              | Family             | Genus             | Species      | WT_Mutant        | Mutant            | Taxonomy_OTU                              |
|---------|--------------|-------------------|--------------------|--------------------|-------------------|--------------|------------------|-------------------|-------------------------------------------|
| OTU_100 | 7.504574699  | Ascomycota        | Dothideomycetes    | unidentified       | NA                | unidentified | Ler_0_tt5        | tt5               | Dothideomycetes;NA;OTU_100                |
| OTU_100 | -7.239164302 | Ascomycota        | Dothideomycetes    | unidentified       | NA                | unidentified | Col_0_pap1_D     | <i>pap1_D</i>     | Dothideomycetes;NA;OTU_100                |
| OTU_101 | -7.921424937 | Basidiomycota     | Tremellomycetes    | Trichosporonaceae  | Apiotrichum       | NA           | Ler_0_tt5        | tt5               | Tremellomycetes;Apiotrichum;OTU_101       |
| OTU_101 | -6.681159279 | Basidiomycota     | Tremellomycetes    | Trichosporonaceae  | Apiotrichum       | NA           | Ler_0_tt3_1tt5_1 | <i>tt3_1tt5_1</i> | Tremellomycetes;Apiotrichum;OTU_101       |
| OTU_108 | 8.177646591  | Ascomycota        | Sordariomycetes    | Hypocreaceae       | Trichoderma       | NA           | Ler_0_tt7_7      | <i>tt7_7</i>      | Sordariomycetes;Trichoderma;OTU_108       |
| OTU_108 | 7.212444929  | Ascomycota        | Sordariomycetes    | Hypocreaceae       | Trichoderma       | NA           | Ler_0_tt5        | tt5               | Sordariomycetes;Trichoderma;OTU_108       |
| OTU_112 | 7.87917308   | Ascomycota        | Sordariomycetes    | Clavicipitaceae    | NA                | NA           | Ler_0_tt5        | tt5               | Sordariomycetes;NA;OTU_112                |
| OTU_120 | 8.213518001  | Ascomycota        | Leotiomycetes      | unidentified       | NA                | unidentified | Col_0_pap1_D     | <i>pap1_D</i>     | Leotiomycetes;NA;OTU_120                  |
| OTU_13  | 2.946962204  | Mortierellomycota | Mortierellomycetes | Mortierellaceae    | Mortierella       | NA           | Ler_0_tt5        | tt5               | Mortierellomycetes;Mortierella;OTU_13     |
| OTU_136 | -7.114027276 | Ascomycota        | Leotiomycetes      | Leotiaceae         | Neobulgaria       | NA           | Ler_0_tt5        | tt5               | Leotiomycetes;Neobulgaria;OTU_136         |
| OTU_139 | 8.143440055  | Ascomycota        | Eurotiomycetes     | unidentified       | NA                | unidentified | Ler_0_tt3        | tt3               | Eurotiomycetes;NA;OTU_139                 |
| OTU_139 | 8.143946282  | Ascomycota        | Eurotiomycetes     | unidentified       | NA                | unidentified | Ler_0_tt5        | tt5               | Eurotiomycetes;NA;OTU_139                 |
| OTU_139 | 7.434121389  | Ascomycota        | Eurotiomycetes     | unidentified       | NA                | unidentified | Ler_0_tt3_1tt5_1 | <i>tt3_1tt5_1</i> | Eurotiomycetes;NA;OTU_139                 |
| OTU_143 | 6.603545949  | Ascomycota        | Sordariomycetes    | Clavicipitaceae    | NA                | unidentified | Ler_0_tt7_7      | <i>tt7_7</i>      | Sordariomycetes;NA;OTU_143                |
| OTU_144 | -9.648528755 | Basidiomycota     | Agaricomycetes     | Ceratobasidiaceae  | NA                | NA           | Ler_0_tt7_7      | <i>tt7_7</i>      | Agaricomycetes;NA;OTU_144                 |
| OTU_144 | -8.926474574 | Basidiomycota     | Agaricomycetes     | Ceratobasidiaceae  | NA                | NA           | Ler_0_tt3        | tt3               | Agaricomycetes;NA;OTU_144                 |
| OTU_144 | -9.389756634 | Basidiomycota     | Agaricomycetes     | Ceratobasidiaceae  | NA                | NA           | Ler_0_tt5        | tt5               | Agaricomycetes;NA;OTU_144                 |
| OTU_144 | -7.403201801 | Basidiomycota     | Agaricomycetes     | Ceratobasidiaceae  | NA                | NA           | Ler_0_tt3_1tt5_1 | <i>tt3_1tt5_1</i> | Agaricomycetes;NA;OTU_144                 |
| OTU_149 | 21.35585122  | Ascomycota        | Dothideomycetes    | unidentified       | NA                | unidentified | Ler_0_tt7_7      | <i>tt7_7</i>      | Dothideomycetes;NA;OTU_149                |
| OTU_15  | -3.527664177 | Ascomycota        | Sordariomycetes    | NA                 | NA                | NA           | Ler_0_tt7_7      | <i>tt7_7</i>      | Sordariomycetes;NA;OTU_15                 |
| OTU_158 | 7.878985515  | Ascomycota        | Leotiomycetes      | Helotiaceae        | Hymenoscyphus     | NA           | Ler_0_tt7_7      | <i>tt7_7</i>      | Leotiomycetes;Hymenoscyphus;OTU_158       |
| OTU_16  | 3.222652392  | Ascomycota        | Dothideomycetes    | Didymosphaeriaceae | Paraphaeosphaeria | NA           | Ler_0_tt3        | tt3               | Dothideomycetes;Paraphaeosphaeria;OTU_16  |
| OTU_161 | 3.484884164  | Ascomycota        | Dothideomycetes    | Didymosphaeriaceae | Paraphaeosphaeria | NA           | Ler_0_tt5        | tt5               | Dothideomycetes;Paraphaeosphaeria;OTU_161 |

|         |              |                   |                               |                                     |                  |                            |                 |           |                                          |
|---------|--------------|-------------------|-------------------------------|-------------------------------------|------------------|----------------------------|-----------------|-----------|------------------------------------------|
| OTU_162 | -7.17060987  | Ascomycota        | Dothideomycetes               | NA                                  | NA               | NA                         | Ler_0_tt3       | tt3       | Dothideomycetes;NA;OTU_162               |
| OTU_162 | -7.816963548 | Ascomycota        | Dothideomycetes               | NA                                  | NA               | NA                         | Ler_0_tt5       | tt5       | Dothideomycetes;NA;OTU_162               |
| OTU_175 | -7.329790935 | Basidiomycota     | Tremellomycetes               | Holtermanniiales_fam_Incertae_sedis | Holtermanniella  | Holtermanniella_takashimae | Ler_0_tt3       | tt3       | Tremellomycetes;Holtermanniella;OTU_175  |
| OTU_175 | -7.978128683 | Basidiomycota     | Tremellomycetes               | Holtermanniiales_fam_Incertae_sedis | Holtermanniella  | Holtermanniella_takashimae | Ler_0_tt5       | tt5       | Tremellomycetes;Holtermanniella;OTU_175  |
| OTU_18  | 3.838093048  | Ascomycota        | Sordariomycetes               | Bionectriaceae                      | Clonostachys     | Clonostachys_rosea         | Ler_0_tt3       | tt3       | Sordariomycetes;Clonostachys;OTU_18      |
| OTU_18  | 5.449163879  | Ascomycota        | Sordariomycetes               | Bionectriaceae                      | Clonostachys     | Clonostachys_rosea         | Ler_0_tt5       | tt5       | Sordariomycetes;Clonostachys;OTU_18      |
| OTU_18  | -6.50283525  | Ascomycota        | Sordariomycetes               | unidentified                        | NA               | unidentified               | Col_0_pap1_D    | pap1_D    | Sordariomycetes;NA;OTU_18                |
| OTU_18  | 3.523682321  | Ascomycota        | Sordariomycetes               | Bionectriaceae                      | Clonostachys     | Clonostachys_rosea         | Col_0_pap1_D    | pap1_D    | Sordariomycetes;Clonostachys;OTU_18      |
| OTU_185 | 6.523850525  | Mortierellomycota | Mortierellomycetes            | Mortierellaceae                     | Mortierella      | Mortierella_sarinyensis    | Col_0_pap1_D    | pap1_D    | Mortierellomycetes;Mortierella;OTU_185   |
| OTU_19  | 4.439279853  | Ascomycota        | Dothideomycetes               | unidentified                        | NA               | unidentified               | Ler_0_tt7_7     | tt7_7     | Dothideomycetes;NA;OTU_19                |
| OTU_192 | 9.623519229  | Ascomycota        | Dothideomycetes               | Tubeufiaceae                        | NA               | unidentified               | Col_0_pap1_D    | pap1_D    | Dothideomycetes;NA;OTU_192               |
| OTU_193 | 8.113579353  | Ascomycota        | Leotiomycetes                 | unidentified                        | NA               | unidentified               | Col_0_pap1_D    | pap1_D    | Leotiomycetes;NA;OTU_193                 |
| OTU_194 | -7.67308984  | Ascomycota        | Leotiomycetes                 | unidentified                        | NA               | unidentified               | Ler_0_tt5       | tt5       | Leotiomycetes;NA;OTU_194                 |
| OTU_194 | 6.939888845  | Ascomycota        | Leotiomycetes                 | unidentified                        | NA               | unidentified               | Col_0_pap1_D    | pap1_D    | Leotiomycetes;NA;OTU_194                 |
| OTU_2   | 3.416073064  | Ascomycota        | Sordariomycetes               | NA                                  | NA               | NA                         | Ler_0_tt7_7     | tt7_7     | Sordariomycetes;NA;OTU_2                 |
| OTU_202 | -7.64465726  | Basidiomycota     | Agaricomycetes                | Psathyrellaceae                     | Psathyrella      | NA                         | Ler_0_tt7_7     | tt7_7     | Agaricomycetes;Psathyrella;OTU_202       |
| OTU_202 | -7.249520882 | Basidiomycota     | Agaricomycetes                | Psathyrellaceae                     | Psathyrella      | NA                         | Ler_0_tt3       | tt3       | Agaricomycetes;Psathyrella;OTU_202       |
| OTU_21  | -6.078779002 | Ascomycota        | Sordariomycetes               | Lasioisphaeriaceae                  | NA               | NA                         | Ler_0_tt3_tt5_1 | tt3_tt5_1 | Sordariomycetes;NA;OTU_21                |
| OTU_212 | -7.379448187 | Basidiomycota     | Tremellomycetes               | Trichosporonaceae                   | Apiotrichum      | NA                         | Ler_0_tt7_7     | tt7_7     | Tremellomycetes;Apiotrichum;OTU_212      |
| OTU_212 | -7.673812139 | Basidiomycota     | Tremellomycetes               | Trichosporonaceae                   | Apiotrichum      | NA                         | Ler_0_tt5       | tt5       | Tremellomycetes;Apiotrichum;OTU_212      |
| OTU_219 | -7.213033222 | Ascomycota        | Dothideomycetes               | Sporormiaceae                       | Westerdykella    | NA                         | Ler_0_tt7_7     | tt7_7     | Dothideomycetes;Westerdykella;OTU_219    |
| OTU_219 | -7.208992094 | Ascomycota        | Dothideomycetes               | Sporormiaceae                       | Westerdykella    | NA                         | Ler_0_tt5       | tt5       | Dothideomycetes;Westerdykella;OTU_219    |
| OTU_22  | 3.326434838  | Ascomycota        | Sordariomycetes               | NA                                  | NA               | NA                         | Ler_0_tt5       | tt5       | Sordariomycetes;NA;OTU_22                |
| OTU_240 | -23.11190232 | Ascomycota        | Sordariomycetes               | Chaetomiaceae                       | Zopfiella        | unidentified               | Ler_0_tt7_7     | tt7_7     | Sordariomycetes;Zopfiella;OTU_240        |
| OTU_275 | 7.24126511   | Ascomycota        | Ascomycota (Unknown Class)    | unidentified                        | NA               | unidentified               | Col_0_pap1_D    | pap1_D    | Ascomycota (Unknown Class);NA;OTU_275    |
| OTU_291 | -6.389045442 | Ascomycota        | Leotiomycetes                 | Pseudeurotiaceae                    | Pseudogymnoascus | NA                         | Col_0_pap1_D    | pap1_D    | Leotiomycetes;Pseudogymnoascus;OTU_291   |
| OTU_295 | -7.404072901 | Ascomycota        | Sordariomycetes               | NA                                  | NA               | NA                         | Ler_0_tt7_7     | tt7_7     | Sordariomycetes;NA;OTU_295               |
| OTU_295 | -7.427866761 | Ascomycota        | Sordariomycetes               | NA                                  | NA               | NA                         | Ler_0_tt5       | tt5       | Sordariomycetes;NA;OTU_295               |
| OTU_308 | -7.143617052 | Basidiomycota     | Basidiomycota (Unknown Class) | NA                                  | NA               | NA                         | Ler_0_tt7_7     | tt7_7     | Basidiomycota (Unknown Class);NA;OTU_308 |
| OTU_308 | -7.380831463 | Basidiomycota     | Basidiomycota (Unknown Class) | NA                                  | NA               | NA                         | Ler_0_tt5       | tt5       | Basidiomycota (Unknown Class);NA;OTU_308 |
| OTU_31  | -4.695872277 | Ascomycota        | Leotiomycetes                 | Helotiales_fam_Incertae_sedis       | NA               | NA                         | Ler_0_tt7_7     | tt7_7     | Leotiomycetes;NA;OTU_31                  |

|         |              |               |                    |                                   |                |                       |                  |            |                                           |
|---------|--------------|---------------|--------------------|-----------------------------------|----------------|-----------------------|------------------|------------|-------------------------------------------|
| OTU_311 | -24.29640394 | Basidiomycota | Microbotryomycetes | Sporidiobolaceae                  | Sporobolomyces | NA                    | Col_0_pap1_D     | pap1_D     | Microbotryomycetes;Sporobolomyces;OTU_311 |
| OTU_312 | -5.126665422 | Ascomycota    | Leotiomycetes      | Helotiales_fam_Incertae_sedis     | NA             | NA                    | Ler_0_tt3        | tt3        | Leotiomycetes;NA;OTU_312                  |
| OTU_34  | -7.927300026 | Ascomycota    | Leotiomycetes      | NA                                | NA             | NA                    | Ler_0_tt5        | tt5        | Leotiomycetes;NA;OTU_34                   |
| OTU_350 | 6.921965834  | Ascomycota    | Dothideomycetes    | Pleosporaceae                     | Alternaria     | NA                    | Ler_0_tt7_7      | tt7_7      | Dothideomycetes;Alternaria;OTU_350        |
| OTU_4   | 10.52284637  | Ascomycota    | Sordariomycetes    | Hypocreales_fam_Incertae_sedis    | Emericellopsis | NA                    | Ler_0_tt7_7      | tt7_7      | Sordariomycetes;Emericellopsis;OTU_4      |
| OTU_4   | 10.30558331  | Ascomycota    | Sordariomycetes    | Hypocreales_fam_Incertae_sedis    | Emericellopsis | NA                    | Ler_0_tt5        | tt5        | Sordariomycetes;Emericellopsis;OTU_4      |
| OTU_42  | 5.014411696  | Ascomycota    | Sordariomycetes    | Glomerellaceae                    | Colletotrichum | NA                    | Ler_0_tt3        | tt3        | Sordariomycetes;Colletotrichum;OTU_42     |
| OTU_4   | -11.58972356 | Ascomycota    | Sordariomycetes    | Hypocreales_fam_Incertae_sedis    | Emericellopsis | NA                    | Col_0_pap1_D     | pap1_D     | Sordariomycetes;Emericellopsis;OTU_4      |
| OTU_510 | 8.830940074  | Basidiomycota | Agaricomycetes     | Podoscyphaceae                    | Cotylidia      | Cotylidia_undulata    | Col_0_pap1_D     | pap1_D     | Agaricomycetes;Cotylidia;OTU_510          |
| OTU_53  | -2.890786682 | Ascomycota    | Pezizomycetes      | Pyrenomataceae                    | NA             | unidentified          | Col_0_pap1_D     | pap1_D     | Pezizomycetes;NA;OTU_53                   |
| OTU_568 | 6.866834602  | Ascomycota    | Eurotiomycetes     | Herpotrichiellaceae               | NA             | unidentified          | Col_0_pap1_D     | pap1_D     | Eurotiomycetes;NA;OTU_568                 |
| OTU_594 | 8.468717385  | Ascomycota    | Eurotiomycetes     | Herpotrichiellaceae               | Exophiala      | NA                    | Ler_0_tt3_1tt5_1 | tt3_1tt5_1 | Eurotiomycetes;Exophiala;OTU_594          |
| OTU_62  | 9.295681979  | Ascomycota    | Eurotiomycetes     | Herpotrichiellaceae               | Exophiala      | NA                    | Ler_0_tt3_1tt5_1 | tt3_1tt5_1 | Eurotiomycetes;Exophiala;OTU_62           |
| OTU_681 | 7.559506803  | Olpidiomycota | Olpidiomycetes     | Olpidiaceae                       | Olpidium       | Olpidium_brassicae    | Ler_0_tt3        | tt3        | Olpidiomycetes;Olpidium;OTU_681           |
| OTU_73  | -4.784809598 | Basidiomycota | Agaricomycetes     | Cantharellales_fam_Incertae_sedis | Minimedusa     | Minimedusa_p_olyspora | Ler_0_tt5        | tt5        | Agaricomycetes;Minimedusa;OTU_73          |
| OTU_73  | -5.207134918 | Basidiomycota | Agaricomycetes     | Cantharellales_fam_Incertae_sedis | Minimedusa     | Minimedusa_p_olyspora | Ler_0_tt3_1tt5_1 | tt3_1tt5_1 | Agaricomycetes;Minimedusa;OTU_73          |
| OTU_97  | -7.837020982 | Ascomycota    | Sordariomycetes    | Lasiosphaeriaceae                 | Apodus         | NA                    | Ler_0_tt3        | tt3        | Sordariomycetes;Apodus;OTU_97             |

**Table S12: Differentially abundant root fungal OTUs of Col\_0 and Ler\_0 and DSMs mutants as determined using DESeq2.**

| otu     | FoldChange   | Phylum        | Class           | Family              | Genus       | Species          | WT_Mutant     | Mutant  | Taxonomy_OTU                        |
|---------|--------------|---------------|-----------------|---------------------|-------------|------------------|---------------|---------|-------------------------------------|
| OTU_10  | 1.882103053  | Ascomycota    | Eurotiomycetes  | Herpotrichiellaceae | Exophiala   | Exophiala_equina | Col_0_dde2    | dde2    | Eurotiomycetes;Exophiala;OTU_10     |
| OTU_100 | -7.495754075 | Ascomycota    | Dothideomycetes | unidentified        | NA          | unidentified     | Col_0_dde2    | dde2    | Dothideomycetes;NA;OTU_100          |
| OTU_100 | 6.425878972  | Ascomycota    | Dothideomycetes | unidentified        | NA          | unidentified     | Ler_0_aba3_2  | aba3_2  | Dothideomycetes;NA;OTU_100          |
| OTU_100 | -7.006268931 | Ascomycota    | Dothideomycetes | unidentified        | NA          | unidentified     | Col_0_etr1_3  | etr1_3  | Dothideomycetes;NA;OTU_100          |
| OTU_101 | 28.46061325  | Basidiomycota | Tremellomycetes | Trichosporonaceae   | Apiotrichum | NA               | Col_0_etr1_3  | etr1_3  | Tremellomycetes;Apiotrichum;OTU_101 |
| OTU_101 | 8.202767347  | Basidiomycota | Tremellomycetes | Trichosporonaceae   | Apiotrichum | NA               | Col_0_355_ERF | 355_ERF | Tremellomycetes;Apiotrichum;OTU_101 |
| OTU_102 | 7.285957569  | Ascomycota    | Sordariomycetes | Nectriaceae         | Cosmospora  | NA               | Ler_0_aba3_2  | aba3_2  | Sordariomycetes;Cosmospora;OTU_102  |
| OTU_112 | 8.00748141   | Ascomycota    | Sordariomycetes | Clavicipitaceae     | NA          | NA               | Ler_0_aba3_2  | aba3_2  | Sordariomycetes;NA;OTU_112          |
| OTU_112 | -6.885221005 | Ascomycota    | Sordariomycetes | Clavicipitaceae     | NA          | NA               | Col_0_355_ERF | 355_ERF | Sordariomycetes;NA;OTU_112          |

|         |              |                   |                    |                                |                   |                     |                    |                     |                                           |
|---------|--------------|-------------------|--------------------|--------------------------------|-------------------|---------------------|--------------------|---------------------|-------------------------------------------|
| OTU_138 | -6.311944529 | Mortierellomycota | Mortierellomycetes | Mortierellaceae                | Mortierella       | NA                  | Col_0_fad3_2       | <i>fad3_2</i>       | Mortierellomycetes;Mortierella;OTU_138    |
| OTU_16  | 2.934218836  | Ascomycota        | Dothideomycetes    | Didymosphaeriaceae             | Paraphaeosphaeria | NA                  | Ler_0_aba3_2       | <i>aba3_2</i>       | Dothideomycetes;Paraphaeosphaeria;OTU_16  |
| OTU_169 | 6.742545838  | Ascomycota        | Sordariomycetes    | Hypocreaceae                   | Trichoderma       | Trichoderma_hamatum | Ler_0_aba3_2       | <i>aba3_2</i>       | Sordariomycetes;Trichoderma;OTU_169       |
| OTU_18  | 3.780584273  | Ascomycota        | Sordariomycetes    | Bionectriaceae                 | Clonostachys      | Clonostachys_rosea  | Col_0_dde2         | <i>dde2</i>         | Sordariomycetes;Clonostachys;OTU_18       |
| OTU_182 | -6.451133021 | Ascomycota        | Sordariomycetes    | unidentified                   | NA                | unidentified        | Col_0_dde2         | <i>dde2</i>         | Sordariomycetes;NA;OTU_182                |
| OTU_192 | 9.941350083  | Ascomycota        | Dothideomycetes    | Tubeufiaceae                   | NA                | unidentified        | Col_0_fad7_1fad8_1 | <i>fad7_1fad8_1</i> | Dothideomycetes;NA;OTU_192                |
| OTU_2   | 4.215495308  | Ascomycota        | Sordariomycetes    | NA                             | NA                | NA                  | Ler_0_aba3_2       | <i>aba3_2</i>       | Sordariomycetes;NA;OTU_2                  |
| OTU_20  | -2.373713992 | Basidiomycota     | Tremellomycetes    | Trimorphomycetaceae            | Saitozyma         | Saitozyma_podzolica | Col_0_etr1_3       | <i>etr1_3</i>       | Tremellomycetes;Saitozyma;OTU_20          |
| OTU_20  | -2.607981961 | Basidiomycota     | Tremellomycetes    | Trimorphomycetaceae            | Saitozyma         | Saitozyma_podzolica | Col_0_35S_ERF      | <i>35S_ERF</i>      | Tremellomycetes;Saitozyma;OTU_20          |
| OTU_270 | -5.967881708 | Ascomycota        | Eurotiomycetes     | Herpotrichiellaceae            | NA                | unidentified        | Col_0_etr1_3       | <i>etr1_3</i>       | Eurotiomycetes;NA;OTU_270                 |
| OTU_270 | -8.058365353 | Ascomycota        | Eurotiomycetes     | Herpotrichiellaceae            | NA                | unidentified        | Col_0_fad7_1fad8_1 | <i>fad7_1fad8_1</i> | Eurotiomycetes;NA;OTU_270                 |
| OTU_28  | 10.13959186  | Ascomycota        | Dothideomycetes    | unidentified                   | NA                | unidentified        | Col_0_dde2         | <i>dde2</i>         | Dothideomycetes;NA;OTU_28                 |
| OTU_28  | 10.18709369  | Ascomycota        | Dothideomycetes    | unidentified                   | NA                | unidentified        | Col_0_fad3_2       | <i>fad3_2</i>       | Dothideomycetes;NA;OTU_28                 |
| OTU_291 | -7.336946384 | Ascomycota        | Leotiomycetes      | Pseudeurotiaceae               | Pseudogymnoascus  | NA                  | Col_0_35S_ERF      | <i>35S_ERF</i>      | Leotiomycetes;Pseudogymnoascus;OTU_291    |
| OTU_31  | 2.733087404  | Ascomycota        | Leotiomycetes      | Helotiales_fam_Incertae_sedis  | NA                | NA                  | Col_0_fad7_1fad8_1 | <i>fad7_1fad8_1</i> | Leotiomycetes;NA;OTU_31                   |
| OTU_311 | -23.82877559 | Basidiomycota     | Microbotryomycetes | Sporidiobolaceae               | Sporobolomyces    | NA                  | Col_0_dde2         | <i>dde2</i>         | Microbotryomycetes;Sporobolomyces;OTU_311 |
| OTU_311 | -22.73712027 | Basidiomycota     | Microbotryomycetes | Sporidiobolaceae               | Sporobolomyces    | NA                  | Col_0_fad3_2       | <i>fad3_2</i>       | Microbotryomycetes;Sporobolomyces;OTU_311 |
| OTU_311 | -24.63177062 | Basidiomycota     | Microbotryomycetes | Sporidiobolaceae               | Sporobolomyces    | NA                  | Col_0_fad7_1fad8_1 | <i>fad7_1fad8_1</i> | Microbotryomycetes;Sporobolomyces;OTU_311 |
| OTU_32  | -7.47474356  | Ascomycota        | Sordariomycetes    | Nectriaceae                    | Fusicolla         | NA                  | Col_0_35S_ERF      | <i>35S_ERF</i>      | Sordariomycetes;Fusicolla;OTU_32          |
| OTU_323 | 8.102098552  | Basidiomycota     | Agaricomycetes     | NA                             | NA                | NA                  | Col_0_35S_ERF      | <i>35S_ERF</i>      | Agaricomycetes;NA;OTU_323                 |
| OTU_34  | 7.795898546  | Ascomycota        | Leotiomycetes      | NA                             | NA                | NA                  | Col_0_35S_ERF      | <i>35S_ERF</i>      | Leotiomycetes;NA;OTU_34                   |
| OTU_34  | 27.04282278  | Ascomycota        | Leotiomycetes      | NA                             | NA                | NA                  | Col_0_fad3_2       | <i>fad3_2</i>       | Leotiomycetes;NA;OTU_34                   |
| OTU_34  | 7.650526861  | Ascomycota        | Leotiomycetes      | NA                             | NA                | NA                  | Col_0_fad7_1fad8_1 | <i>fad7_1fad8_1</i> | Leotiomycetes;NA;OTU_34                   |
| OTU_38  | -2.676327718 | Mortierellomycota | Mortierellomycetes | Mortierellaceae                | Mortierella       | Mortierella_alpina  | Col_0_fad7_1fad8_1 | <i>fad7_1fad8_1</i> | Mortierellomycetes;Mortierella;OTU_38     |
| OTU_4   | -11.53667581 | Ascomycota        | Sordariomycetes    | Hypocreales_fam_Incertae_sedis | Emericellopsis    | NA                  | Col_0_dde2         | <i>dde2</i>         | Sordariomycetes;Emericellopsis;OTU_4      |
| OTU_4   | 10.9746589   | Ascomycota        | Sordariomycetes    | Hypocreales_fam_Incertae_sedis | Emericellopsis    | NA                  | Ler_0_aba3_2       | <i>aba3_2</i>       | Sordariomycetes;Emericellopsis;OTU_4      |
| OTU_418 | 8.656062204  | Basidiomycota     | Agaricomycetes     | Ceratobasidiaceae              | NA                | unidentified        | Col_0_etr1_3       | <i>etr1_3</i>       | Agaricomycetes;NA;OTU_418                 |
| OTU_42  | -11.03442474 | Ascomycota        | Sordariomycetes    | Hypocreales_fam_Incertae_sedis | Emericellopsis    | NA                  | Col_0_etr1_3       | <i>etr1_3</i>       | Sordariomycetes;Emericellopsis;OTU_42     |
| OTU_47  | -6.589989262 | Ascomycota        | Sordariomycetes    | Bionectriaceae                 | Clonostachys      | NA                  | Col_0_fad3_2       | <i>fad3_2</i>       | Sordariomycetes;Clonostachys;OTU_47       |
| OTU_53  | -3.397046911 | Ascomycota        | Pezizomycetes      | Pyrenomataceae                 | NA                | unidentified        | Col_0_etr1_3       | <i>etr1_3</i>       | Pezizomycetes;NA;OTU_53                   |
| OTU_53  | -8.6133535   | Ascomycota        | Pezizomycetes      | Pyrenomataceae                 | NA                | unidentified        | Col_0_35S_ERF      | <i>35S_ERF</i>      | Pezizomycetes;NA;OTU_53                   |



|        |              |               |                            |                     |                  |                              |                    |                     |                                         |
|--------|--------------|---------------|----------------------------|---------------------|------------------|------------------------------|--------------------|---------------------|-----------------------------------------|
| OTU_53 | -3.533603901 | Ascomycota    | Pezizomycetes              | Pyronemataceae      | NA               | unidentified                 | Col_0_fad7_1fad8_1 | <i>fad7_1fad8_1</i> | Pezizomycetes;NA;OTU_53                 |
| OTU_56 | -6.83349302  | Basidiomycota | Tremellomycetes            | Tetragonomycetaceae | Tetragonomycetes | Tetragonomycetes_ulinginosus | Col_0_fad3_2       | <i>fad3_2</i>       | Tremellomycetes;Tetragonomycetes;OTU_56 |
| OTU_67 | -7.206670744 | Basidiomycota | Tremellomycetes            | Piskurozymaceae     | Solicoccozyma    | NA                           | Col_0_fad3_2       | <i>fad3_2</i>       | Tremellomycetes;Solicoccozyma;OTU_67    |
| OTU_74 | 5.096039468  | Olpidiomycota | Olpidiomycetes             | Olpidiaceae         | Olpidium         | Olpidium_brassicae           | Col_0_fad3_2       | <i>fad3_2</i>       | Olpidiomycetes;Olpidium;OTU_74          |
| OTU_75 | -7.963377376 | Basidiomycota | Tremellomycetes            | unidentified        | NA               | unidentified                 | Col_0_dde2         | <i>dde2</i>         | Tremellomycetes;NA;OTU_75               |
| OTU_75 | -4.377698948 | Basidiomycota | Tremellomycetes            | unidentified        | NA               | unidentified                 | Col_0_fad7_1fad8_1 | <i>fad7_1fad8_1</i> | Tremellomycetes;NA;OTU_75               |
| OTU_79 | -6.568431136 | Ascomycota    | Ascomycota (Unknown Class) | NA                  | NA               | NA                           | Col_0_fad3_2       | <i>fad3_2</i>       | Ascomycota (Unknown Class);NA;OTU_79    |
| OTU_85 | 6.678709828  | Ascomycota    | Sordariomycetes            | Nectriaceae         | Dactylonectria   | NA                           | Ler_0_aba3_2       | <i>aba3_2</i>       | Sordariomycetes;Dactylonectria;OTU_85   |
